# Supplementary material for: Data-driven structural angle mining elucidates hidden design rules for hydrogen evolution single-atom electrocatalysts
Source: Royal Society of Chemistry journal article supplement (doi:10.1039/d6sc01740a), 2026-06-01
Supplement: d6sc01740a1.pdf [file d6sc01740a1.pdf]

# Supplementary Information

## Data-Driven Structural Angle Mining Elucidates Hidden Design Rules for Hydrogen Evolution Single-Atom Electrocatalysts

Bingqing Ge<sup>+acd</sup>, Yang Chen<sup>+b</sup>, Yidi Wu<sup>+ac</sup>, Fenfei Wei<sup>cd</sup>, Fengyu Li<sup>f</sup>, Lulu Chen<sup>ac</sup>,  
Jian Lin<sup>\*b</sup>, Xianzhi Fu<sup>ac</sup> and Sen Lin<sup>\*ace</sup>

<sup>a</sup>State Key Laboratory of Chemistry for NBC Hazards Protection, College of  
Chemistry, Fuzhou University, Fuzhou 350116, China

<sup>b</sup>CAS Key Laboratory of Science and Technology on Applied Catalysis, Dalian  
Institute of Chemical Physics, Chinese Academy of Sciences, Dalian 116023, China

<sup>c</sup>State Key Laboratory of Photocatalysis on Energy and Environment, College of  
Chemistry, Fuzhou University, Fuzhou 350002 China

<sup>d</sup>Key Laboratory of Mesoscopic Chemistry, School of Chemistry, Nanjing University,  
Nanjing 210023, Jiangsu, China

<sup>e</sup>College of Chemistry and Chemical Engineering, Institute for Green Chemistry and  
Environmental Science, Inner Mongolia University, Hohhot 010021, China

<sup>f</sup>Research Center for Quantum Physics and Technologies, School of Physical Science  
and Technology, Inner Mongolia University, Hohhot, 010021, China

<sup>+</sup> These authors contributed equally to this work.

\*Email: [jianlin@dicp.ac.cn](mailto:jianlin@dicp.ac.cn), [slin@fzu.edu.cn](mailto:slin@fzu.edu.cn)

24

## Table of Contents

### 25 Supplementary Figures

26 **Figure S1.** Structures of  $\text{TM}_1@MX_2\text{-X}$  (chalcogen-vacancy).

27 **Figure S2.** Structures of  $\text{TM}_1@MX_2\text{-M}$  (metal-vacancy).

28 **Figure S3.** The H adsorption site on  $\text{TM}_1@MX_2\text{-M}$  (metal-vacancy).

29 **Figure S4-7.** Correlation analysis of structural distortions with HER activity for  
30  $\text{TM}_1@MoS_2$ .

31 **Figure S8-10.** Correlation analysis of structural distortions with OER activity for  
32  $\text{TM}_1@MoS_2$ .

33 **Figure S11.** The relationship between  $d$ -band center ( $\epsilon_d$ ) of  $\text{TM}_1$  (transition metal) and  
34  $\Delta G_{*H}$  for  $\text{TM}_1@MoS_2\text{-S}$ .

35 **Figure S12.** The relationship between  $\epsilon_d$  of  $\text{TM}_1$  and OER overpotential for  
36  $\text{TM}_1@MoS_2\text{-S}$ .

37 **Figure S13.** The linear relationship between  $I_{\text{band-Mo}}$  and  $\Delta G_{*H}$  for  $\text{TM}_1@MoS_2\text{-Mo}$ .

38 **Figure S14.** The linear relationship between  $I_{\text{band-Mo}}$  and  $\phi_{\text{HER-Mo}}$  for  $\text{TM}_1@MoS_2\text{-Mo}$ .

39 **Figure S15.** The linear relationship between  $I_{\text{band-W}}$  and  $\Delta G_{*H}$  for  $\text{TM}_1@WSe_2\text{-W}$ .

40 **Figure S16.** The linear relationship between  $I_{\text{band-W}}$  and  $\phi_{\text{HER-W}}$  for  $\text{TM}_1@WSe_2\text{-W}$ .

41 **Figure S17-20.** The relationship between predicted HER activities and DFT-computed  
42 values in  $\text{TM}_1@MX_2\text{-X}$  system.

43 **Figure S21-24.** The relationship between predicted OER activities and DFT-computed  
44 values in  $\text{TM}_1@MX_2\text{-X}$  system.

45 **Figure S25-26.** The relationship between predicted HER activities and DFT-computed  
46 values in  $\text{TM}_1@MX_2\text{-M}$  system.

47 **Figure S27.** Comparison of experimental results and predicted OER overpotential  
48 results.

49 **Figure S28.** XRD patterns of the  $MoS_2$ ,  $Ir_1@MoS_2$  and  $V_1@MoS_2$  catalysts.

50 **Figure S29.** X-ray photoelectron spectra of Ir species.

51 **Figure S30.** The performance of HER over the  $Ir_1@MoS_2$  samples with different metal  
52 contents.

53 **Figure S31.** Current density plots against scan rates and current density differences  
54 plotted against scan rates.

55 **Figure S32.** Electrochemical impedance spectroscopy evaluation for Ir<sub>1</sub>@MoS<sub>2</sub> and  
56 MoS<sub>2</sub> samples.

57 **Figure S33.** The HER reaction mechanism over the Ir<sub>1</sub>@MoS<sub>2</sub>.

58 **Figure S34.** The differential charge density of Ir<sub>1</sub>@MoS<sub>2</sub>-S with H adsorbed.

#### 59 **Supplementary Tables**

60 **Table S1-4** Input features (band centers, eV) of SISSO of TM<sub>1</sub>@MX<sub>2</sub>-X catalysts.

61 **Table S5-6** Input features (band centers, eV) of SISSO of TM<sub>1</sub>@MX<sub>2</sub>-M catalysts.

62 **Table S7** Band centers (eV) of metal sites in TM<sub>1</sub>@MoS<sub>2</sub>-S and TM<sub>1</sub>@WSe<sub>2</sub>-Se.

63 **Table S8** Band centers (eV) of S/Se sites in TM<sub>1</sub>@MoS<sub>2</sub>-Mo and TM<sub>1</sub>@WSe<sub>2</sub>-W.

64

## 66 Computational methods

67 All spin-polarized DFT calculations were performed using the Vienna *ab initio*  
68 simulation package (VASP) based on plane-wave basis sets.<sup>1</sup> The VASPKIT<sup>2</sup> was used  
69 as the post-processing package to process and analyze the data output by VASP. The  
70 combination of the projected augmented wave (PAW) method<sup>3</sup> and the generalized  
71 gradient approximation (GGA)<sup>4</sup> with the PBE functional is employed to describe the  
72 exchange-correlation interactions among electrons, ions, and electron self-interactions.<sup>5</sup>  
73 The plane-wave expansion cut off energy is set to 400 eV, and the convergence criteria  
74 for energy and force in electronic iteration steps are  $10^{-4}$  eV and  $0.02$  eV/Å,  
75 respectively. A  $5 \times 5 \times 1$  supercell was chosen after convergence testing with a vacuum  
76 layer set in the z direction with a minimum thickness of 20 Å to avoid interactions  
77 between periodic layers. Van der Waals weak interactions were also considered in the  
78 calculations, described using the DFT-D3 dispersion correction.<sup>6</sup> When sampling the  
79 first Brillouin zone of the reciprocal space (K-space), we utilized a  $2 \times 2 \times 1$  grid based  
80 on the Monkhorst–Pack scheme.<sup>7</sup> The adsorption energy ( $E_{\text{ads}}$ ) and the corresponding  
81 Gibbs free energy ( $\Delta G$ ) for the binding of different reaction intermediates to the surface  
82 are calculated using the following formulas:<sup>8–10</sup>

$$E_{\text{ads}} = E_{*A} - E^* - E_A \quad (1)$$

$$\Delta G = \Delta E + \Delta E_{\text{ZPE}} - T\Delta S \quad (2)$$

83 In the formula for calculating  $E_{\text{ads}}$ ,  $E_A$  represents the energy of the adsorbate, while  
84  $E^*$  and  $E_{*A}$  represent the total energies before and after adsorption on the transition  
85 metal dichalcogenides (TMDs) surface, respectively. For the calculation of the free  
86 energy,  $\Delta E$  is the energy difference obtained from DFT calculations between the  
87 products and reactants.  $\Delta E_{\text{ZPE}}$  and  $\Delta S$  represent the change in zero-point energy and  
88 entropy, respectively.

89 Catalytic activity is usually measured by the key indicator of overpotential ( $\eta$ ). A  
90 smaller overpotential indicates superior catalytic performance.<sup>11</sup> For HER, the  
91 overpotential is determined by the absolute value of the hydrogen adsorption Gibbs free

92 energy ( $\Delta G_{*H}$ ),<sup>12</sup> where an ideal catalyst exhibits  $\Delta G_{*H} \approx 0$  eV.<sup>13,14</sup> For OER, the  
 93 overpotential arises from the potential-determining step, which is calculated using the  
 94 following expression:

$$\Delta G_1 = G_{*OH} + 1/2G_{H_2} - G_{H_2O} - G_{*} \quad (3)$$

$$\Delta G_2 = G_{*O} + 1/2G_{H_2} - G_{*OH} \quad (4)$$

$$\Delta G_3 = G_{*OOH} + 1/2G_{H_2} - G_{*O} - G_{H_2O} \quad (5)$$

$$\Delta G_4 = 4.92 - \Delta G_1 - \Delta G_2 - \Delta G_3 \quad (6)$$

$$95 \quad \eta_{OER} = \max[\Delta G_1, \Delta G_2, \Delta G_3, \Delta G_4]/e - 1.23 \text{ V.}^8$$

96 SISSO was adopted to conduct the training of the catalytic activity model. The  
 97 Pearson correlation coefficient was utilized to evaluate the independence of features,  
 98 and the formula is as follows.<sup>15</sup>

$$r = \frac{\sum_i (x_i - \bar{x})(y_i - \bar{y})}{\sqrt{\sum_i (x_i - \bar{x})^2 \sum_i (y_i - \bar{y})^2}} \quad (7)$$

99 Here,  $x$  and  $y$  are the compared features. The coefficient  $r$  lies between  $-1$  and  $1$ .  
 100 Values approaching  $-1$  correspond to strong negative linear correlation; values  
 101 approaching  $1$  correspond to strong positive linear correlation; and values approaching  
 102  $0$  indicate negligible linear correlation.

### 103 **Catalyst preparation**

104 Materials: the source and purity of the chemicals used are as follows:  $H_2IrCl_6$   
 105 (Aladdin, Ir $\geq$ 36%), vanadlum chlorldde (Aladdin, >96%). thiourea (Aladdin, >99%),  
 106 isopropanol (Aladdin, AR 99.7%), and  $MoS_2$  (XFNANO, thickness 1-5nm).

107 Synthesis of  $Ir_1@MoS_2$ : Firstly, 0.15 mL  $H_2IrCl_6$  solution was added into 1.0 mL  
 108 of 0.5mM thiourea solution. The resulting solution was then introduced into 30 mL of  
 109 a water/isopropanol mixture (1:3, v/v) containing 30 mg of  $MoS_2$ . The suspension was  
 110 sonicated for 6 h and subsequently stirred for another 6 h. Finally, the precipitate was

111 collected, thoroughly rinsed with deionized water, and dried under vacuum to obtain  
112 the Ir<sub>1</sub>@MoS<sub>2</sub> product.

113 V<sub>1</sub>@MoS<sub>2</sub> was synthesized via a one-step hydrothermal method. Firstly, 1.0 mmol  
114 of (NH<sub>4</sub>)<sub>6</sub>Mo<sub>7</sub>O<sub>24</sub>·4H<sub>2</sub>O and 30 mmol of thiourea (CS(NH<sub>2</sub>)<sub>2</sub>) were dissolved in 35 mL  
115 of deionized water under stirring. Then, 2 mL of a 1.0 mg mL<sup>-1</sup> VCl<sub>3</sub> solution was added  
116 dropwise to the above solution and the mixture was stirred for 10 min. The resulting  
117 solution was transferred into a Teflon-lined stainless-steel autoclave and heated at 180  
118 °C for 24 h. The black precipitate was collected and washed several times with  
119 deionized water and ethanol, and then dried at 60 °C to obtain the V<sub>1</sub>@MoS<sub>2</sub> product.

120

121

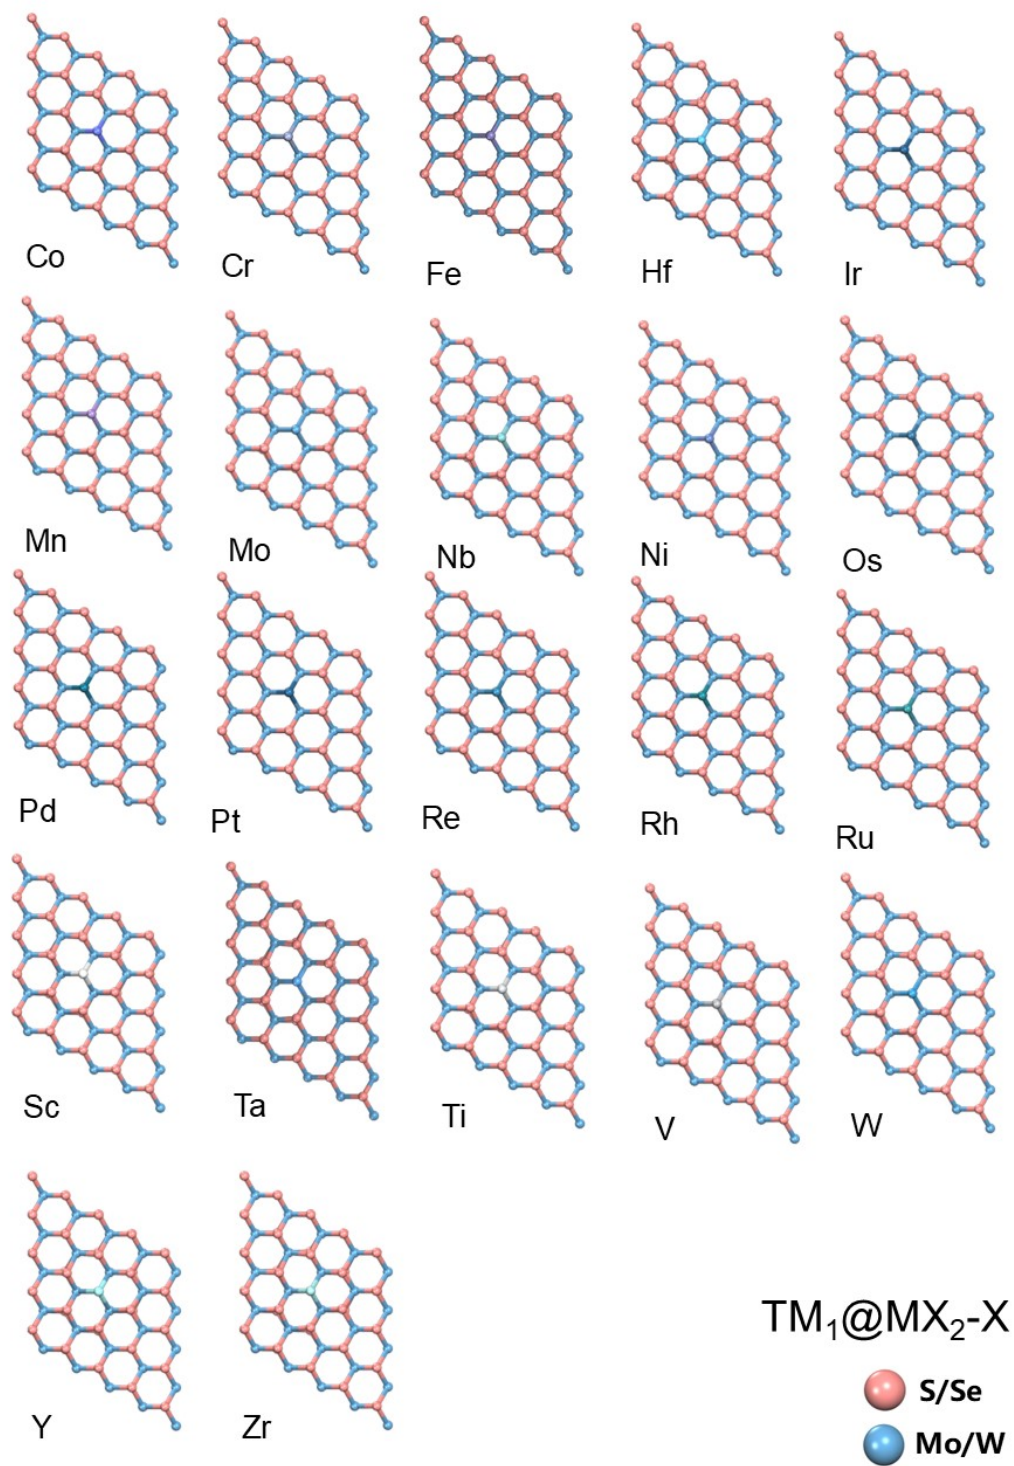

122

123

**Figure S1.** All the structure of TM<sub>1</sub>@MX<sub>2</sub>-X (chalcogen-vacancy).

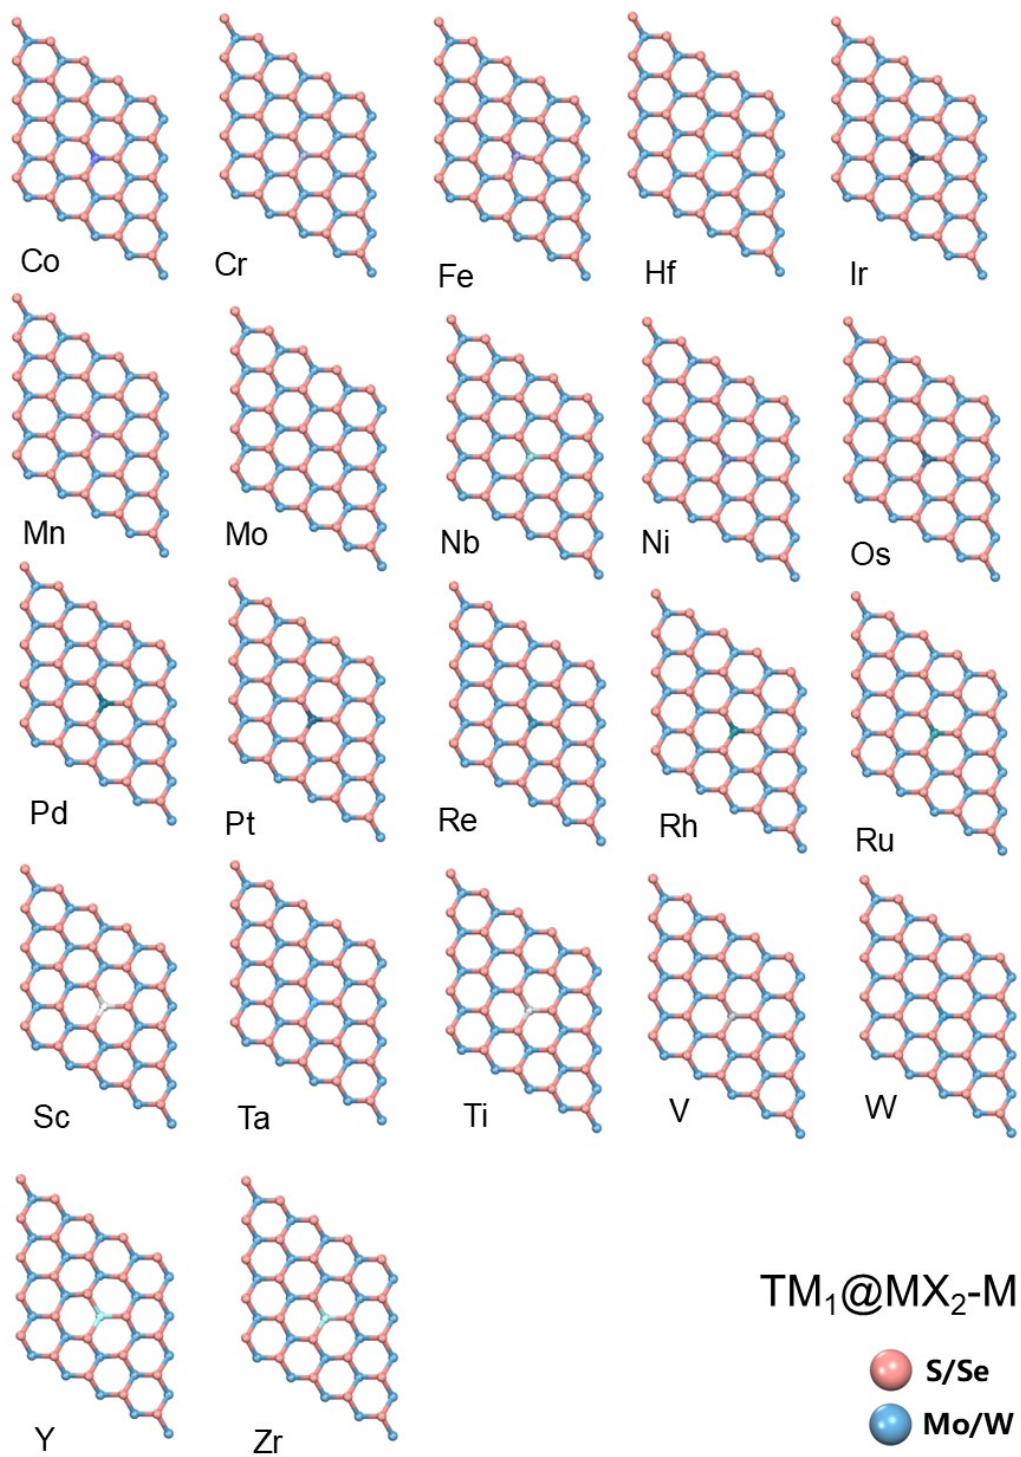

124  
125

**Figure S2.** All the TM<sub>1</sub>@MX<sub>2</sub>-M structures (metal-vacancy).

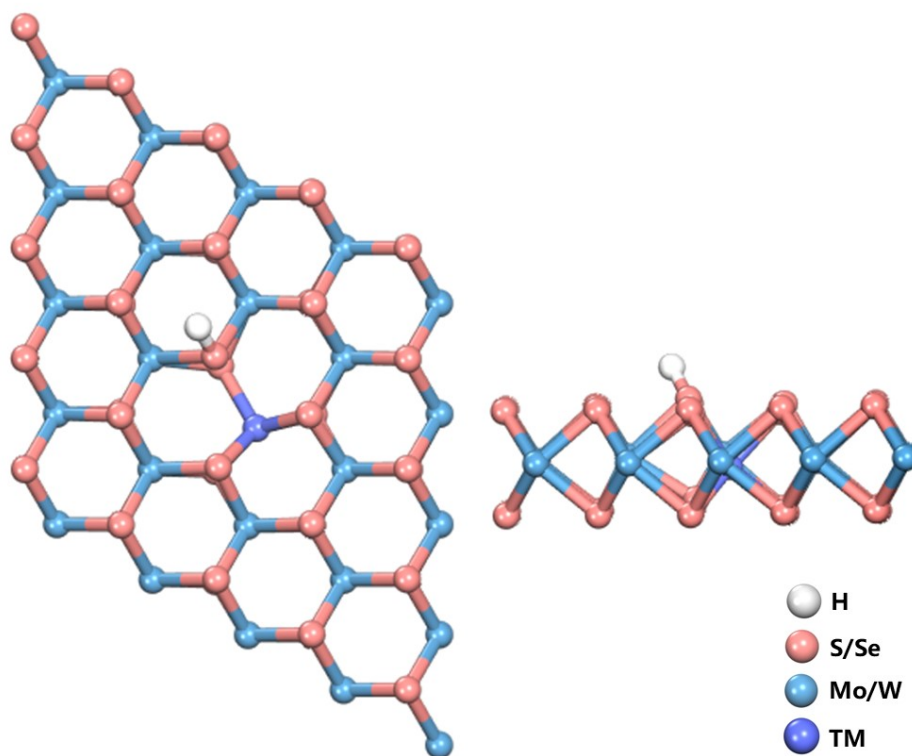

126  
127  
128

**Figure S3.** The H adsorption site on TM<sub>1</sub>@MX<sub>2</sub>-M (metal-vacancy).

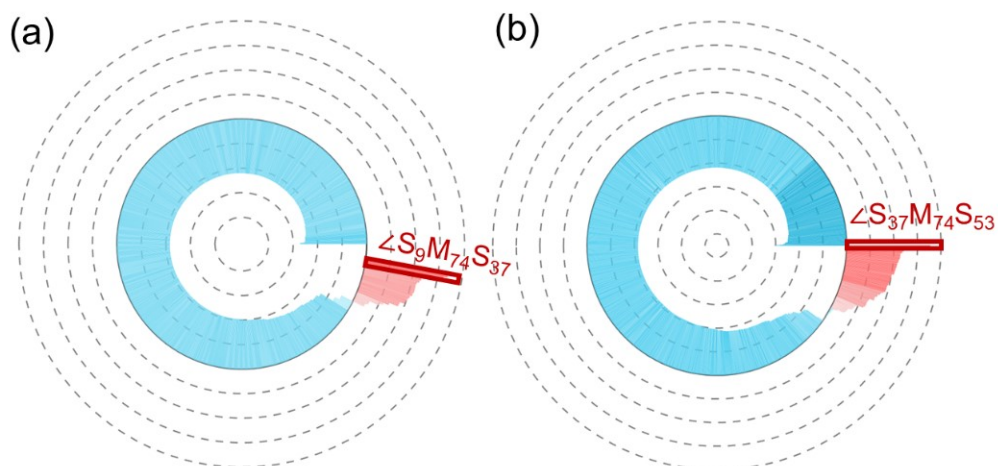

129

130 **Figure S4.** Correlation analysis of structural distortions with HER activity for  $\text{TM}_1@$   
 131  $\text{MoS}_2$ . Pearson correlation coefficients ( $r$ ) between  $\Delta G_{*H}$  and doped metal-centered  
 132 angles (vertex at  $M_{74}$ ) for (a) vertical, and (b) internal distortion modes (dark red: strong  
 133 positive,  $r \approx +1$ ; dark blue: strong negative,  $r \approx -1$ ).

134

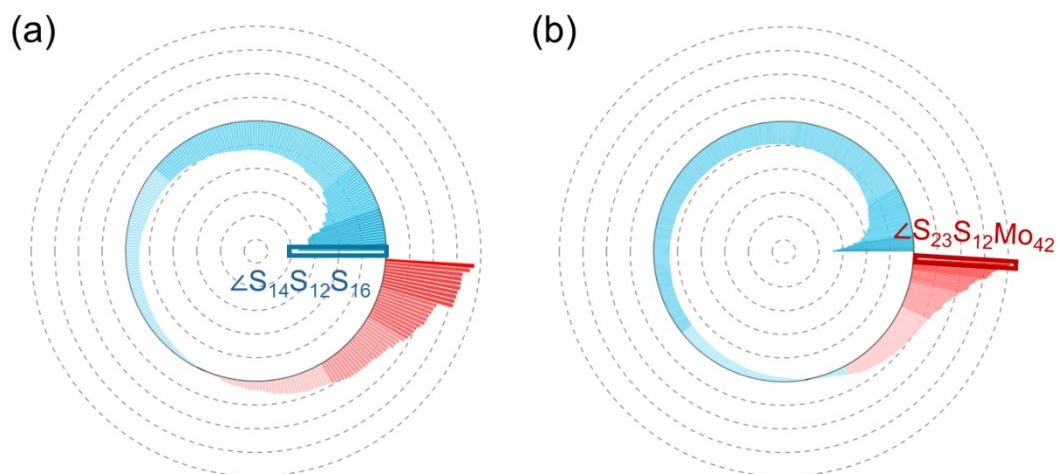

135

136 **Figure S5.** Correlation analysis of structural distortions with HER activity for  
 137  $\text{TM}_1@MoS_2$ . Pearson correlation coefficients ( $r$ ) between  $\Delta G_{*H}$  and first-shell sulfur-  
 138 centered angles (vertex at  $S_{12}$ ) for (a) surface, (b) vertical distortion modes.

139

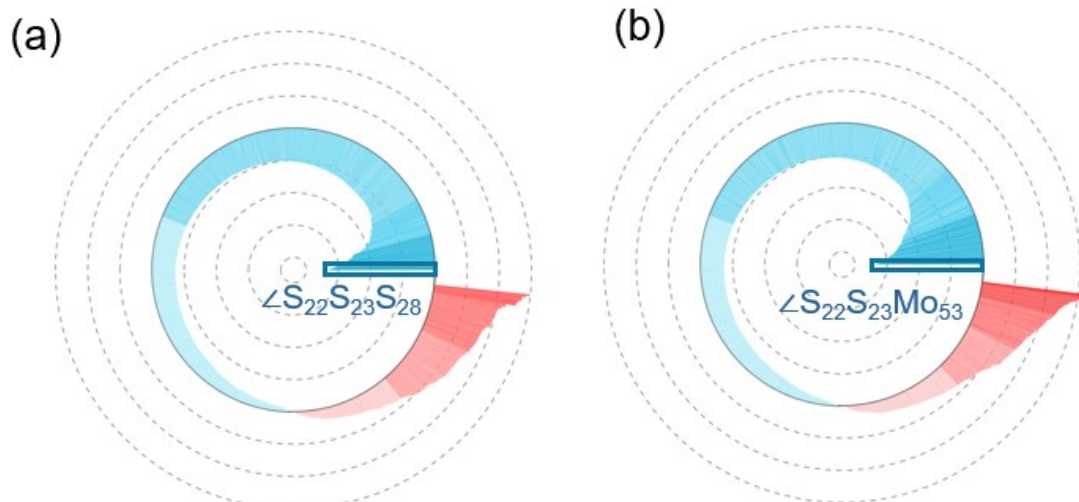

140

141 **Figure S6.** Correlation analysis of structural distortions with HER activity for  $\text{TM}_1@$   
 142  $\text{MoS}_2$ . Schematic diagram of Pearson correlation coefficient ( $r$ ) between  $\Delta G^*_{\text{H}}$  and the  
 143 second-shell S (vertex at  $\text{S}_{23}$ ) atoms-centered angles for (a) vertical, and (b) internal  
 144 distortion modes.

145

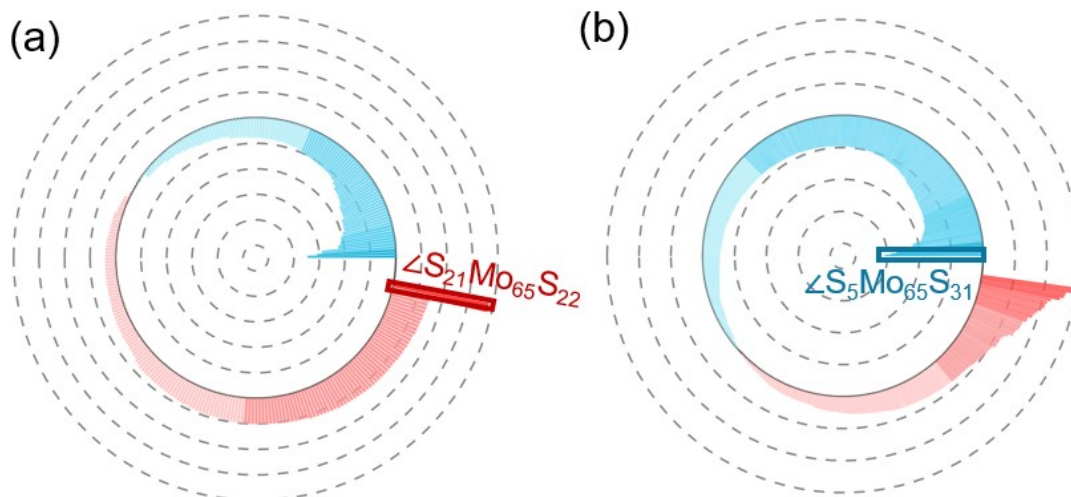

146

147 **Figure S7.** Correlation analysis of structural distortions with HER activity in  $TM_1@$   
 148  $MoS_2$ . Schematic diagram of Pearson correlation coefficient ( $r$ ) between  $\Delta G_{*H}$  and the  
 149 Mo (vertex at  $Mo_{65}$ ) atoms-centered angles for (a) surface, and (b) vertical distortion  
 150 modes.

151

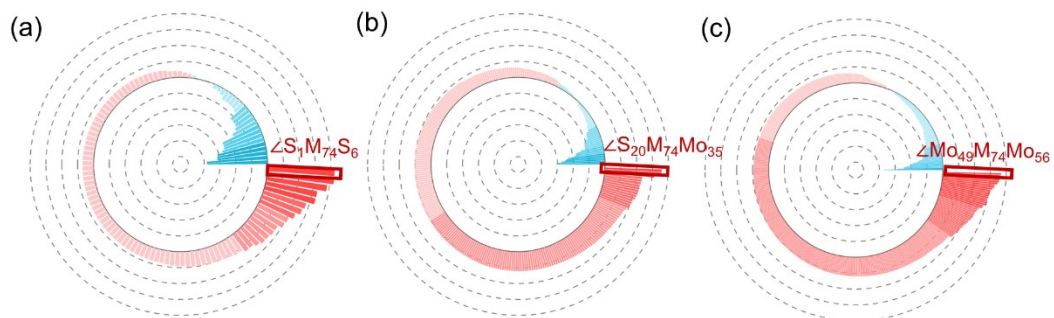

152

153 **Figure S8.** Correlation analysis of structural distortions with OER activity in  $\text{TM}_1@$   
 154  $\text{MoS}_2$ . Pearson correlation coefficients ( $r$ ) between overpotential and doped metal-  
 155 centered angles (vertex at  $\text{M}_{74}$ ) for (a) surface, (b) vertical, and (c) internal distortion  
 156 modes.

157

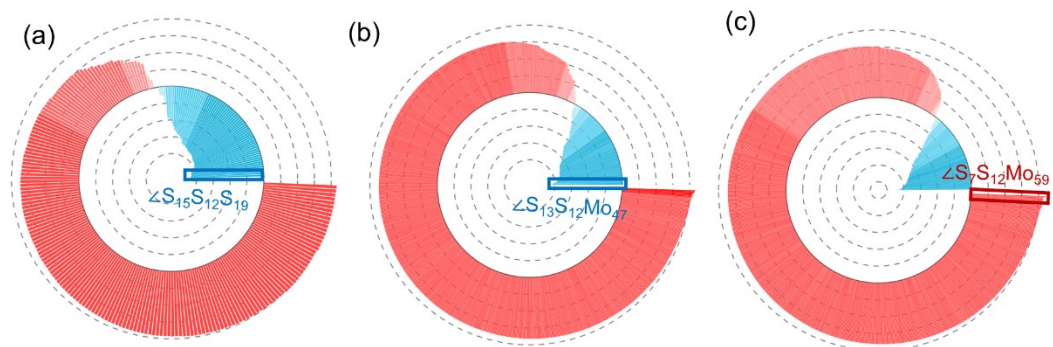

158

159 **Figure S9.** Correlation analysis of structural distortions with OER activity in TM<sub>1</sub>@  
 160 MoS<sub>2</sub>. Pearson correlation coefficients (*r*) between overpotential and first-shell sulfur-  
 161 centered angles (vertex at S<sub>12</sub>) for (a) surface, (b) vertical, and (c) internal distortion  
 162 modes.

163

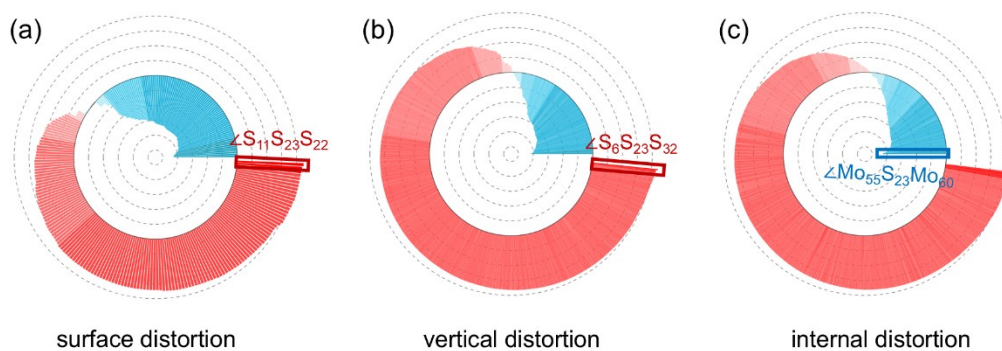

164

165 **Figure S10.** Correlation analysis of structural distortions with OER activity in TM<sub>1</sub>@  
 166 MoS<sub>2</sub>. Pearson correlation coefficients ( $r$ ) between overpotential and second-shell  
 167 sulfur-centered angles (vertex at S<sub>23</sub>) for (a) surface, (b) vertical, and (c) internal  
 168 distortion modes.

169

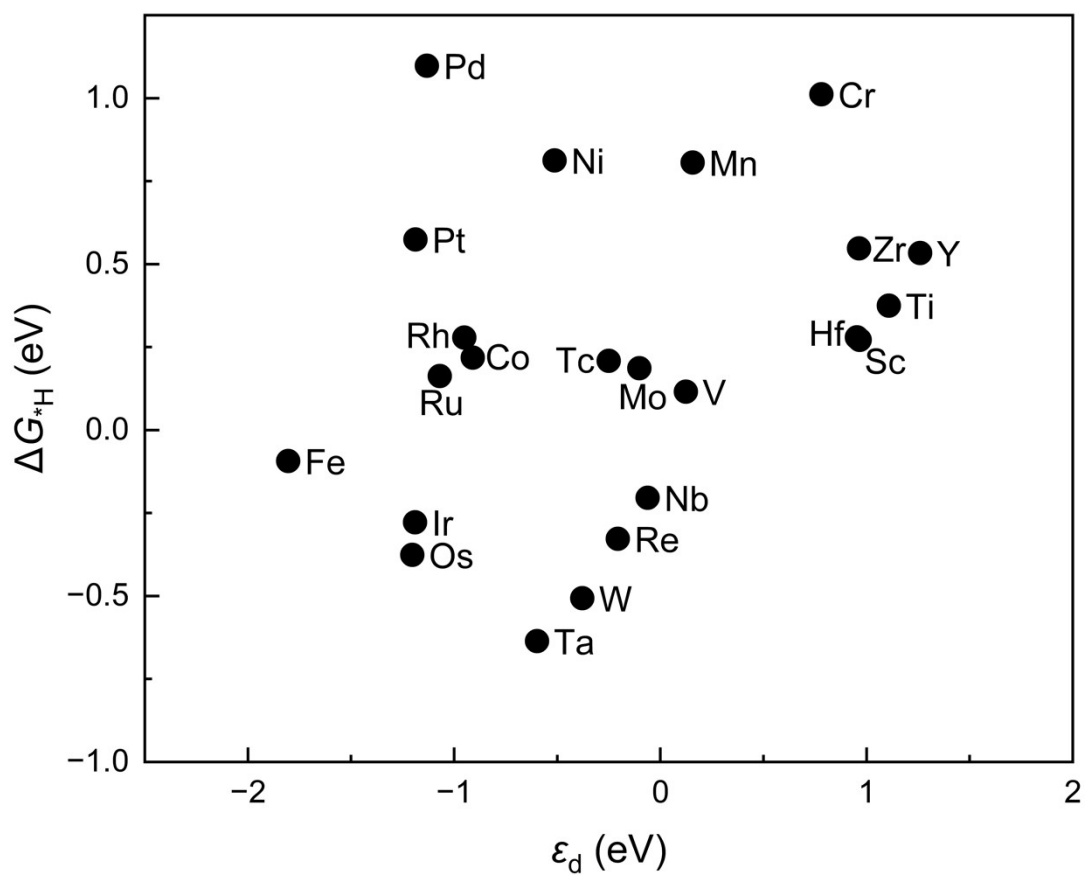

170

171 **Figure S11.** The relationship between  $d$ -band center ( $\epsilon_d$ ) of  $TM_1$  and  $\Delta G_{*H}$  for  $TM_1@$

172  $MoS_2-S$ .

173

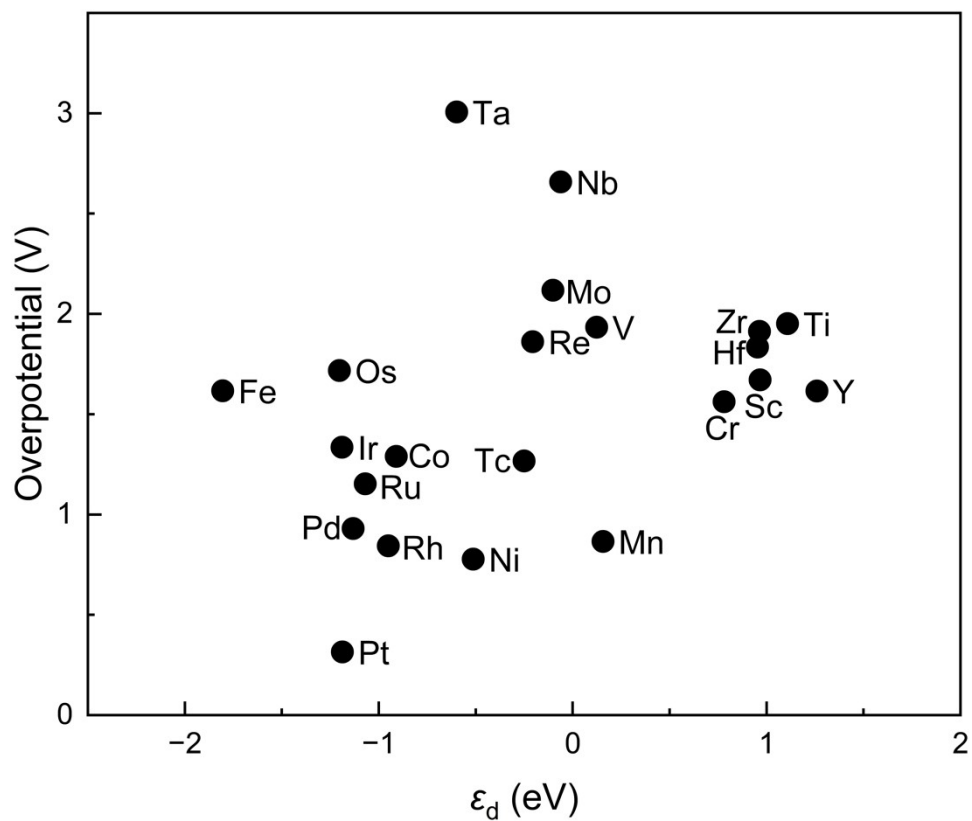

174

175 **Figure S12.** The relationship between  $\epsilon_d$  of  $\text{TM}_1$  and OER overpotential for  $\text{TM}_1@$   
 176  $\text{MoS}_2\text{-S}$ .

177

178

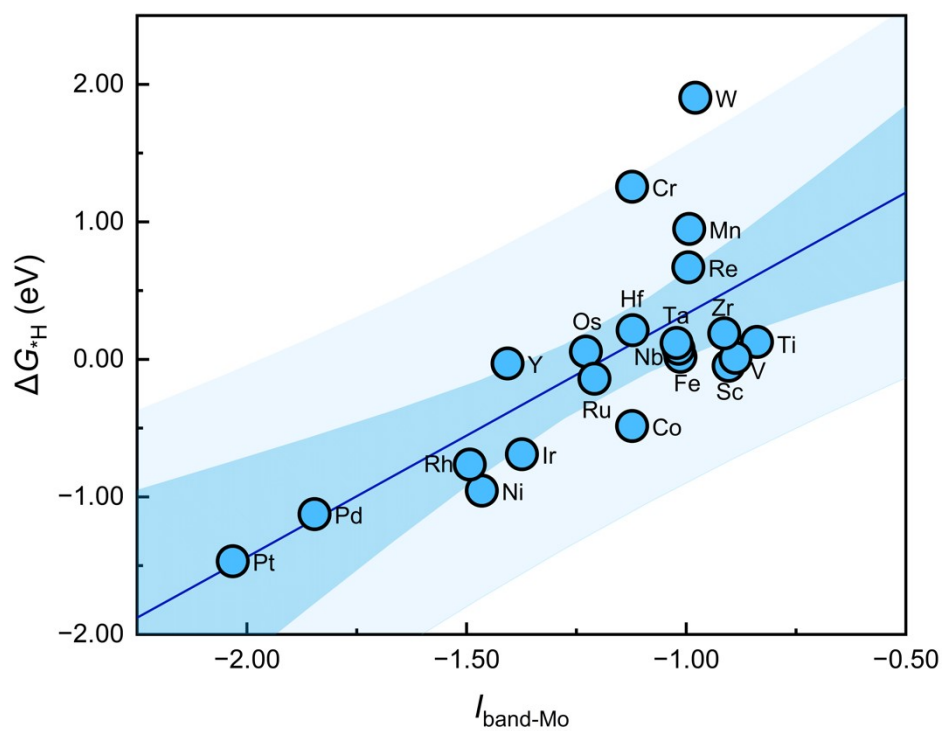

179

180 **Figure S13.** The linear relationship between  $I_{\text{band-Mo}}$  and  $\Delta G_{*H}$  for  $\text{TM}_1@MoS_2\text{-Mo}$ .

181

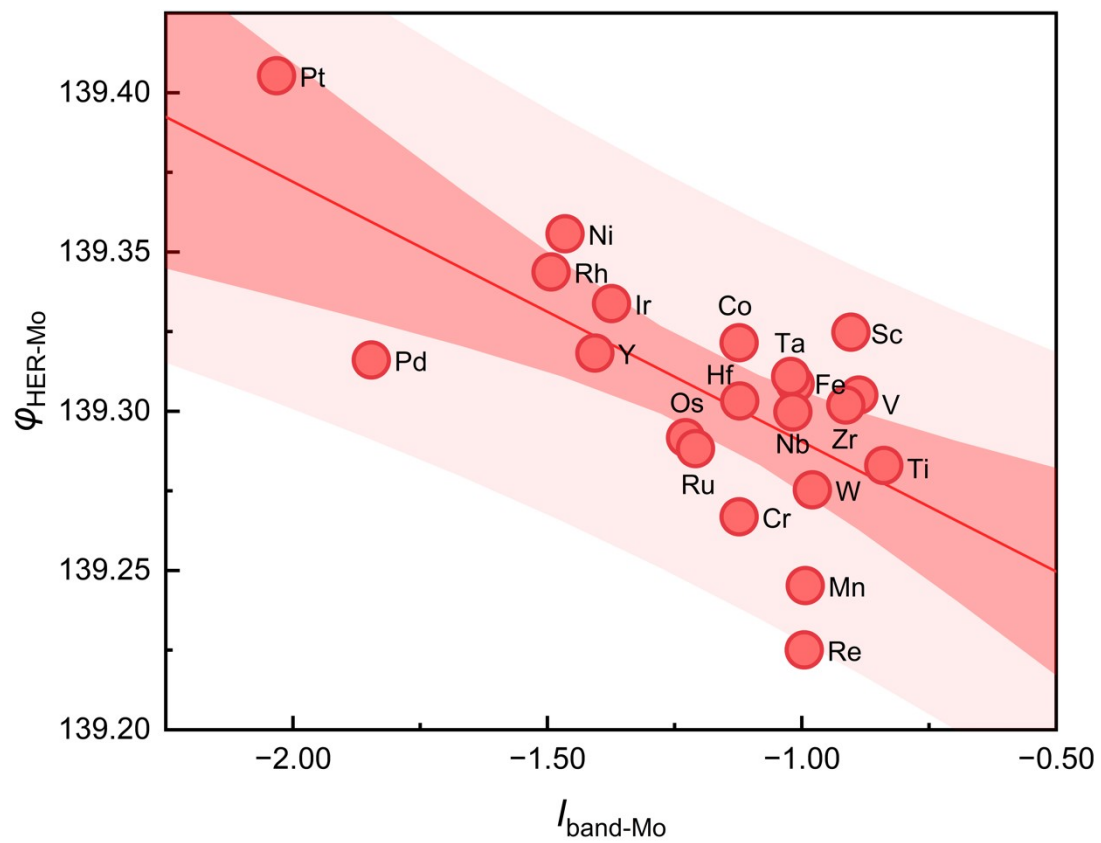

182

183 **Figure S14.** The linear relationship between  $I_{\text{band-Mo}}$  and  $\phi_{\text{HER-Mo}}$  for  $\text{TM}_1@MoS_2\text{-Mo}$ .

184

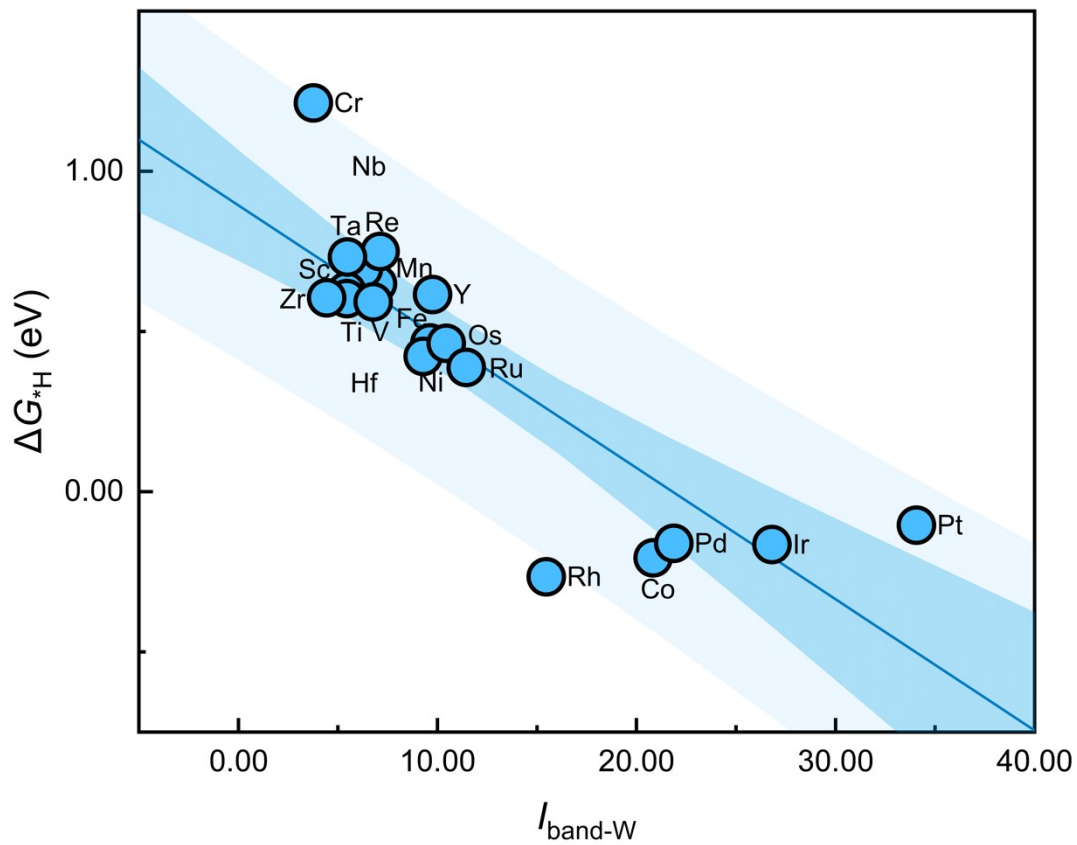

185

186

187

**Figure S15.** The linear relationship between  $I_{\text{band-W}}$  and  $\Delta G_{*H}$  for  $\text{TM}_1@W\text{Se}_2\text{-W}$ .

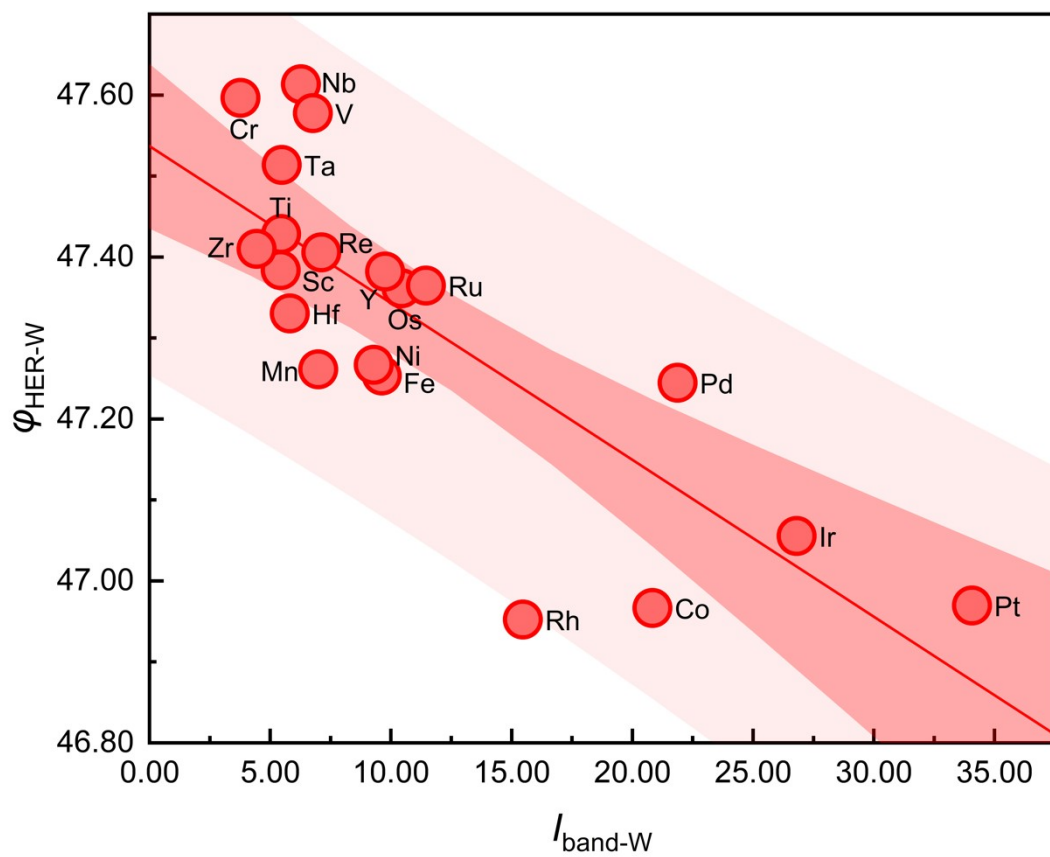

188

189 **Figure S16.** The linear relationship between  $I_{\text{band-W}}$  and  $\phi_{\text{HER-W}}$  for  $\text{TM}_1@W\text{Se}_2\text{-W}$ .

190

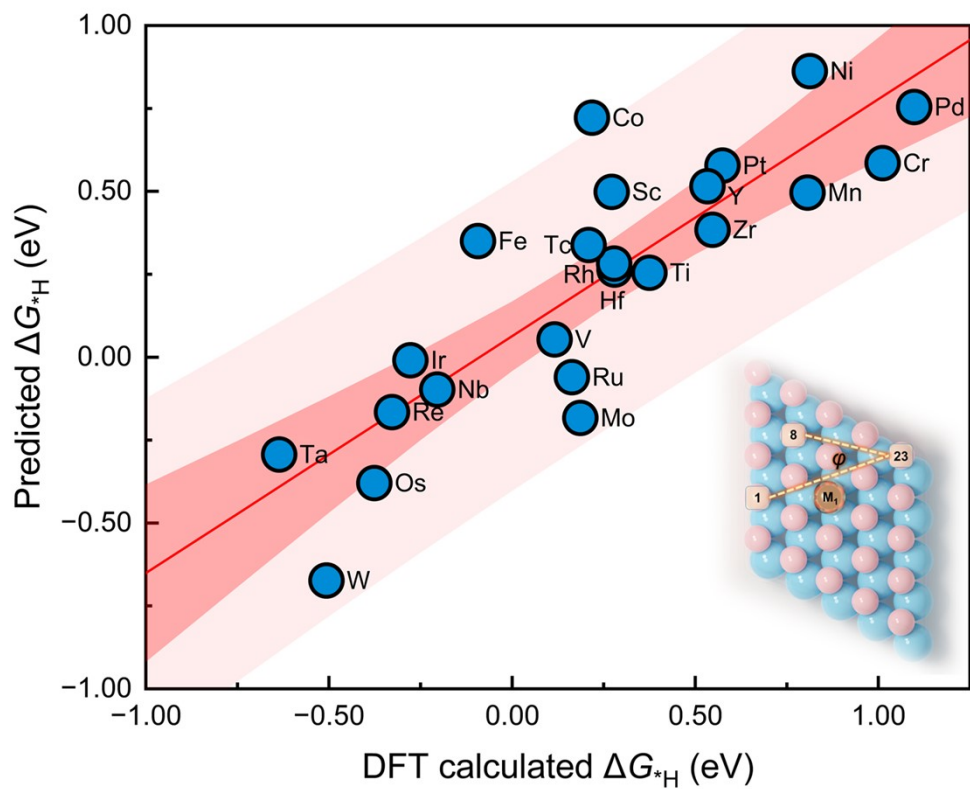

191

192 **Figure S17.** The relationship between predicted HER activities and DFT-computed  
 193 values in TM<sub>1</sub>@MoS<sub>2</sub>-S system ( $\angle S_1 S_{23} S_8$ ).

194

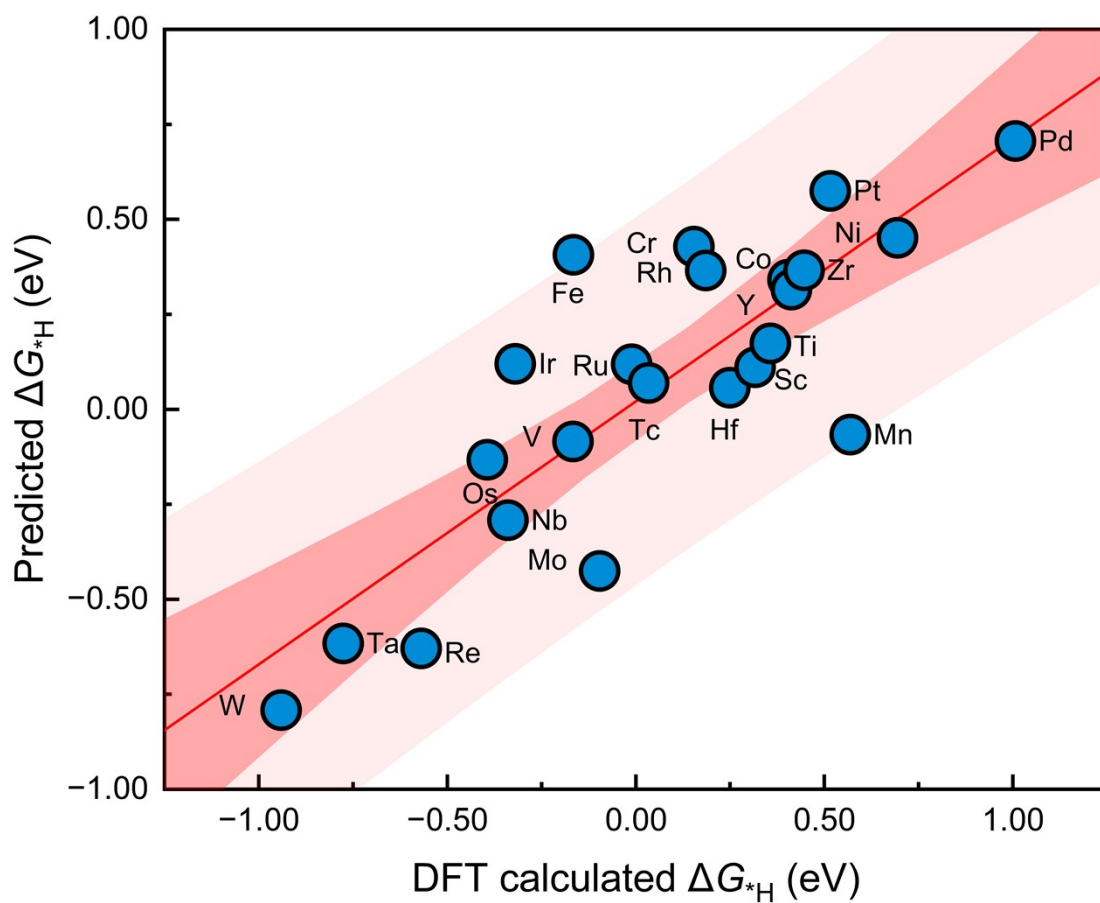

195

196 **Figure S18.** The relationship between predicted HER activities and DFT-computed  
 197 values in  $TM_1@WSe_2$ -Se system ( $\angle S_1S_{23}S_8$ ).

198

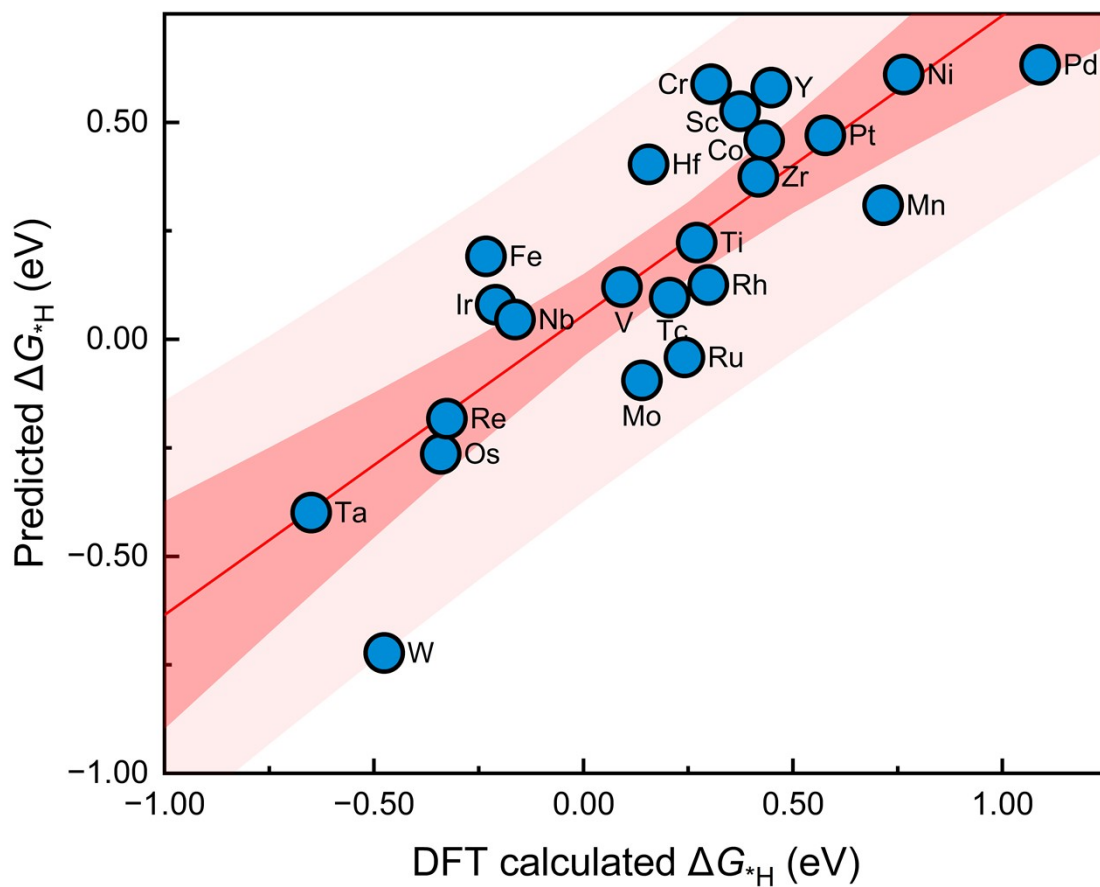

199

200 **Figure S19.** The relationship between predicted HER activities and DFT-computed  
 201 values in  $TM_1@WS_2-S$  system ( $\angle S_1S_{23}S_8$ ).

202

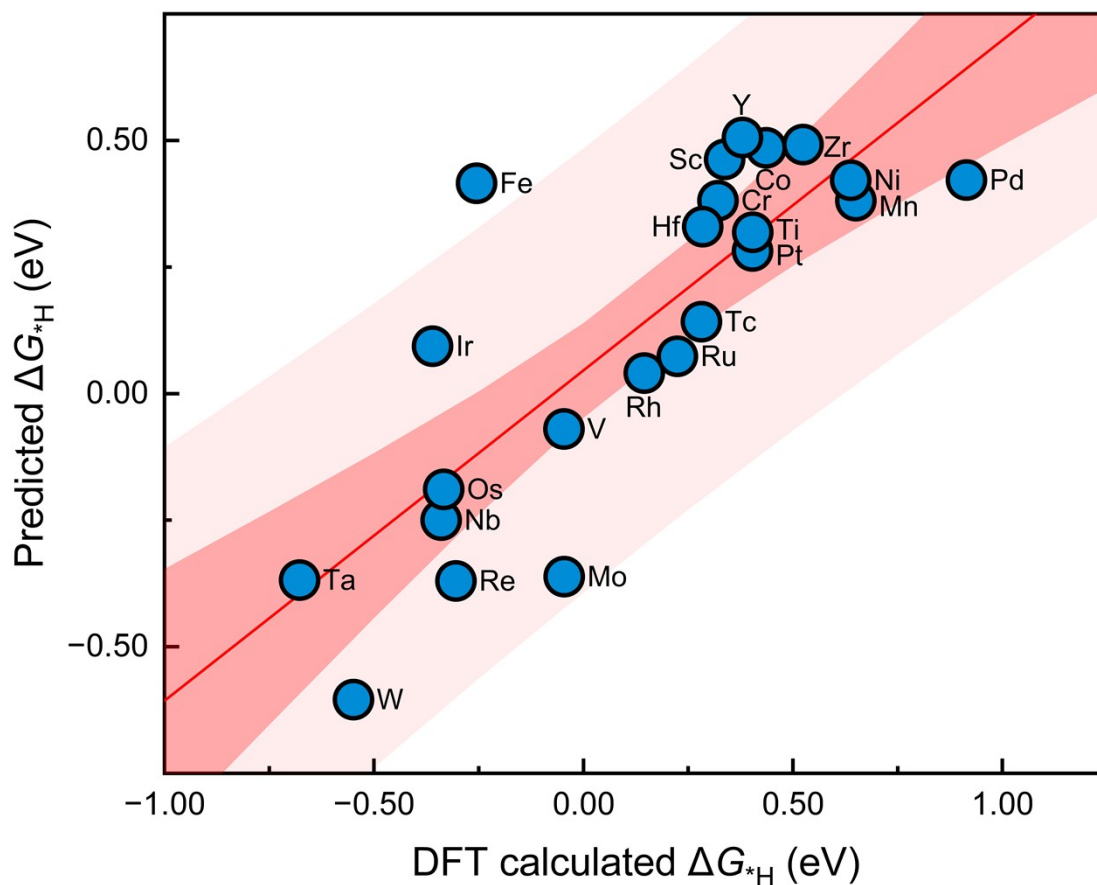

203

204 **Figure S20.** The relationship between predicted HER activities and DFT in  
 205  $\text{TM}_1@MoSe_2\text{-Se}$  system ( $\angle S_1S_{23}S_8$ ).

206

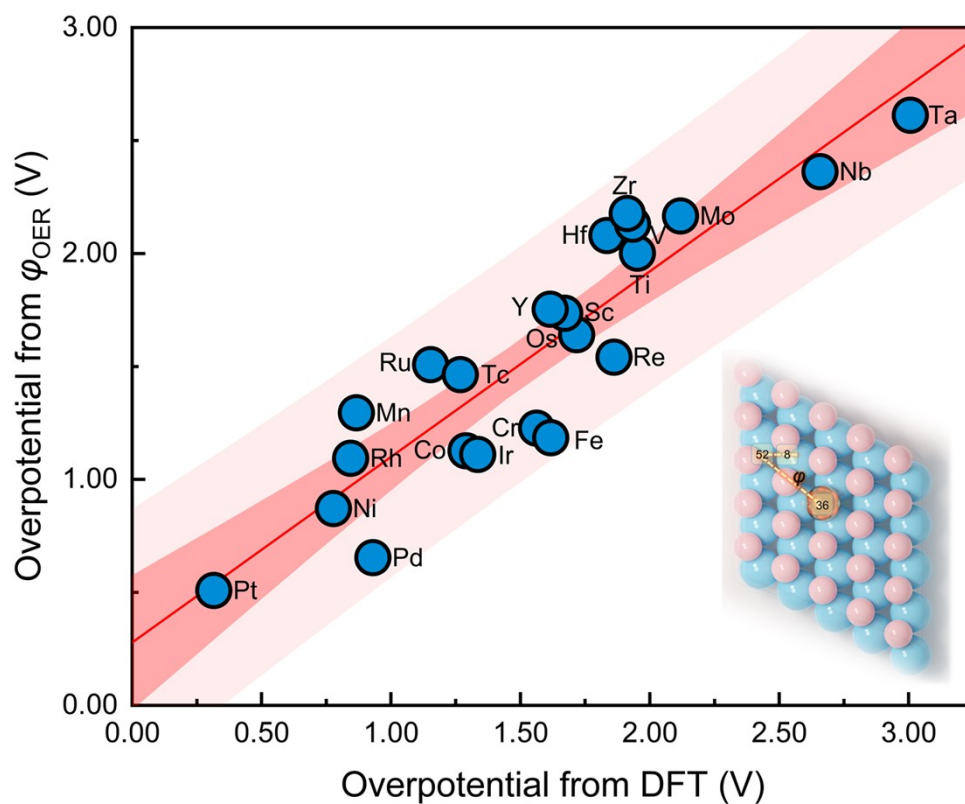

207

208 **Figure S21.** The relationship between predicted OER activities and DFT-computed  
 209 values in  $\text{TM}_1@MoS_2\text{-S}$  system ( $\angle S_8Mo_{52}S_{36}$ ).

210

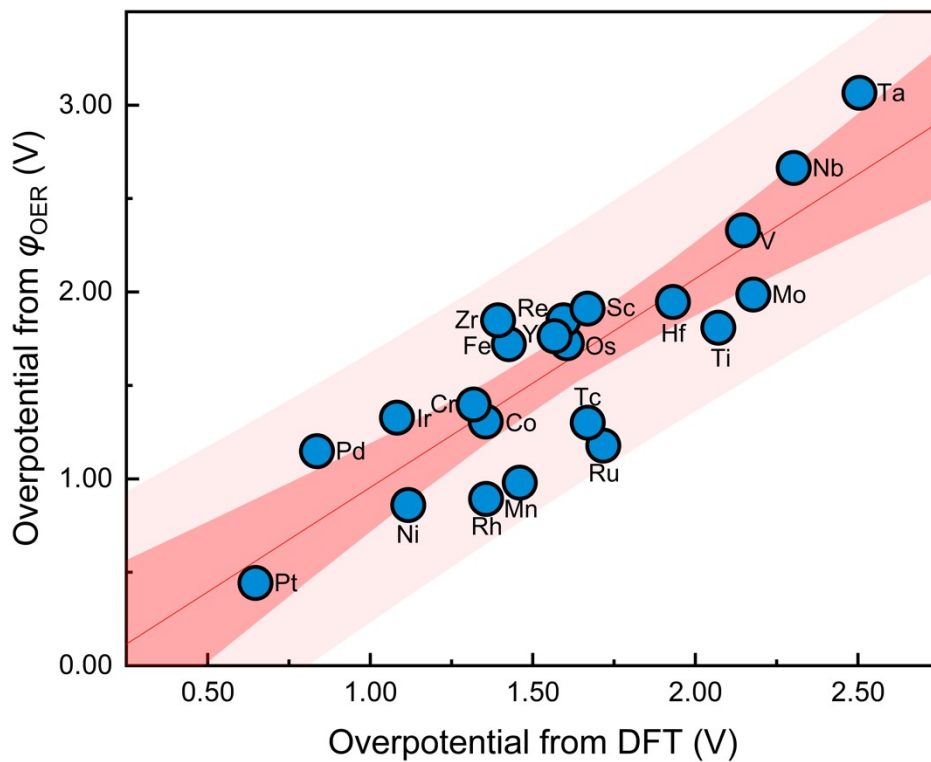

211

212 **Figure S22.** The relationship between predicted OER activities for  $\phi_{\text{OER}}$  and  
 213 DFT-computed values in  $\text{TM}_1@WS_2\text{-S}$  system ( $\angle S_8\text{Mo}_{52}\text{S}_{36}$ ).

214

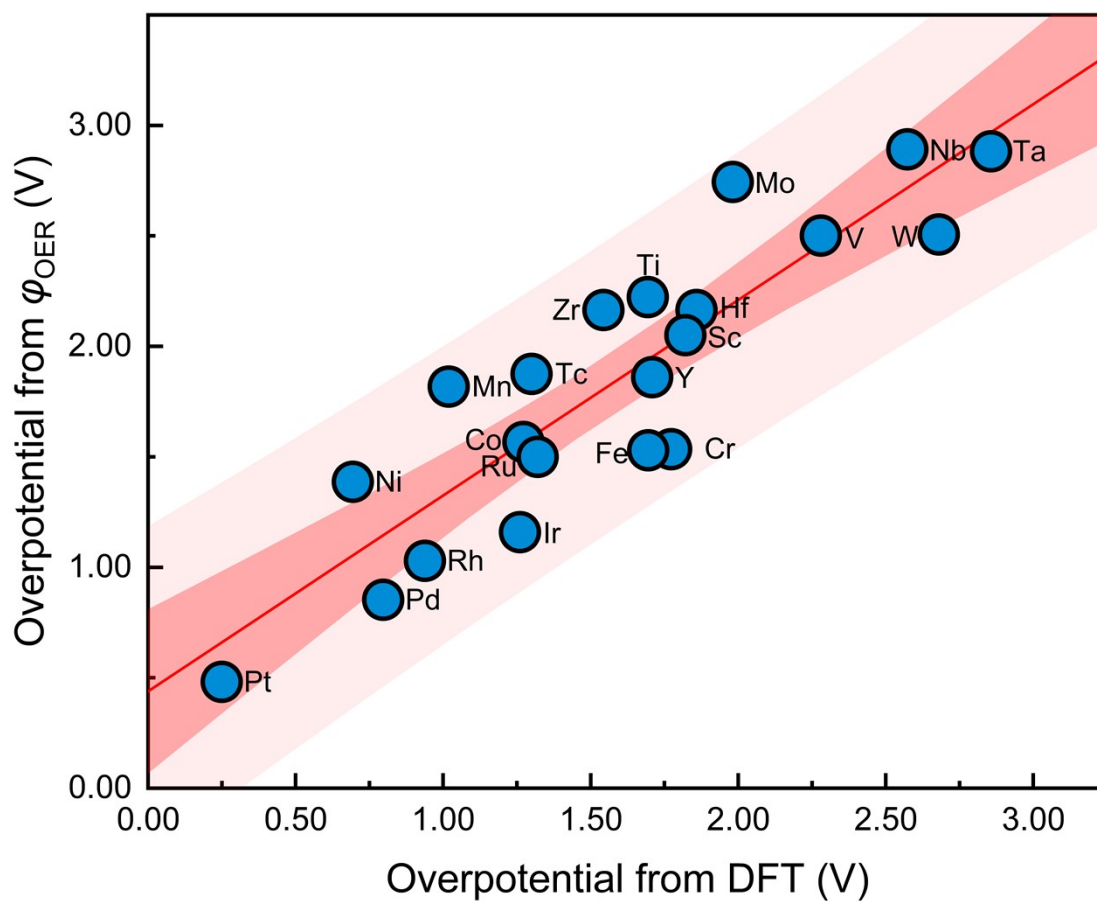

215

216 **Figure S23.** The relationship between predicted OER activities for  $\varphi_{\text{OER}}$  and  
 217 DFT-computed values in  $\text{TM}_1@W\text{Se}_2\text{-Se}$  system ( $\angle\text{S}_8\text{Mo}_{52}\text{S}_{36}$ ).

218

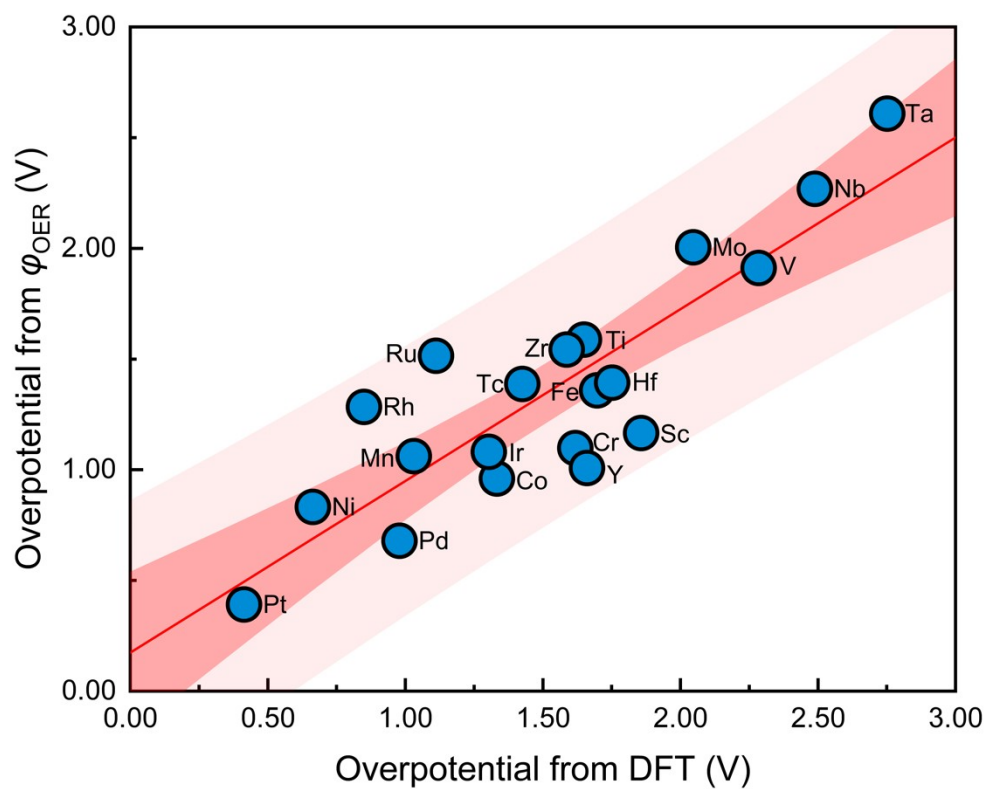

219

220 **Figure S24.** The relationship between predicted OER activities for  $\varphi_{\text{OER}}$  and  
 221 DFT-computed values in  $\text{TM}_1\text{@MoSe}_2\text{-Se}$  system ( $\angle\text{S}_8\text{Mo}_{52}\text{S}_{36}$ ).

222

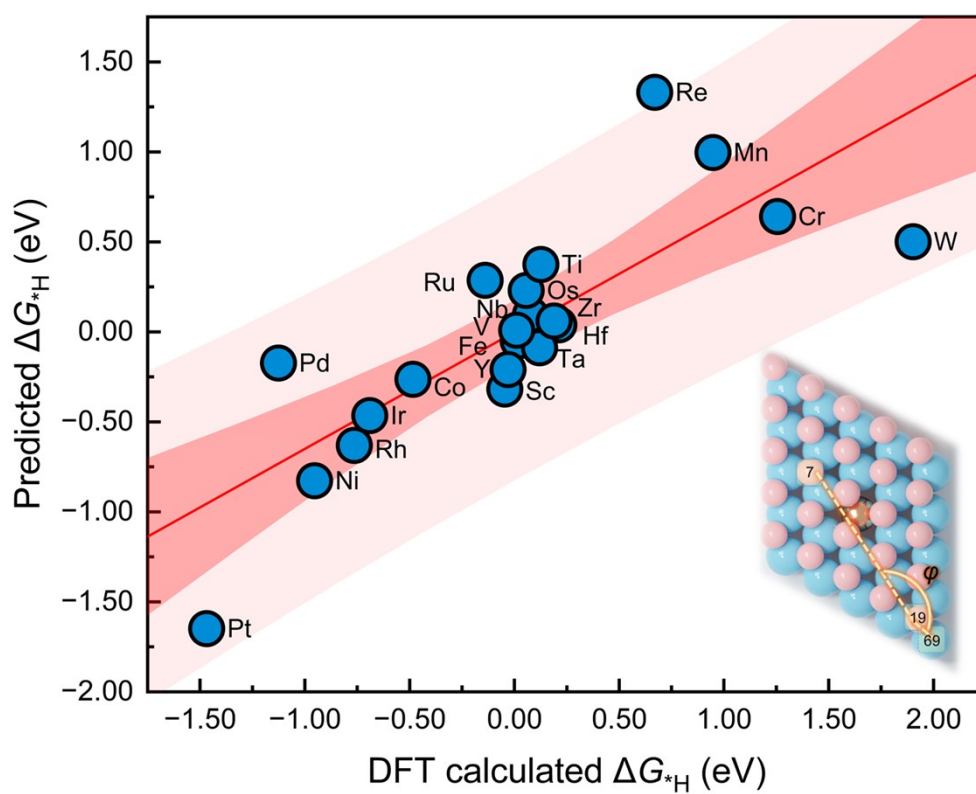

223

224 **Figure S25.** The relationship between predicted HER activities and DFT-computed  
 225 values in TM<sub>1</sub>@MoS<sub>2</sub>-Mo system.

226

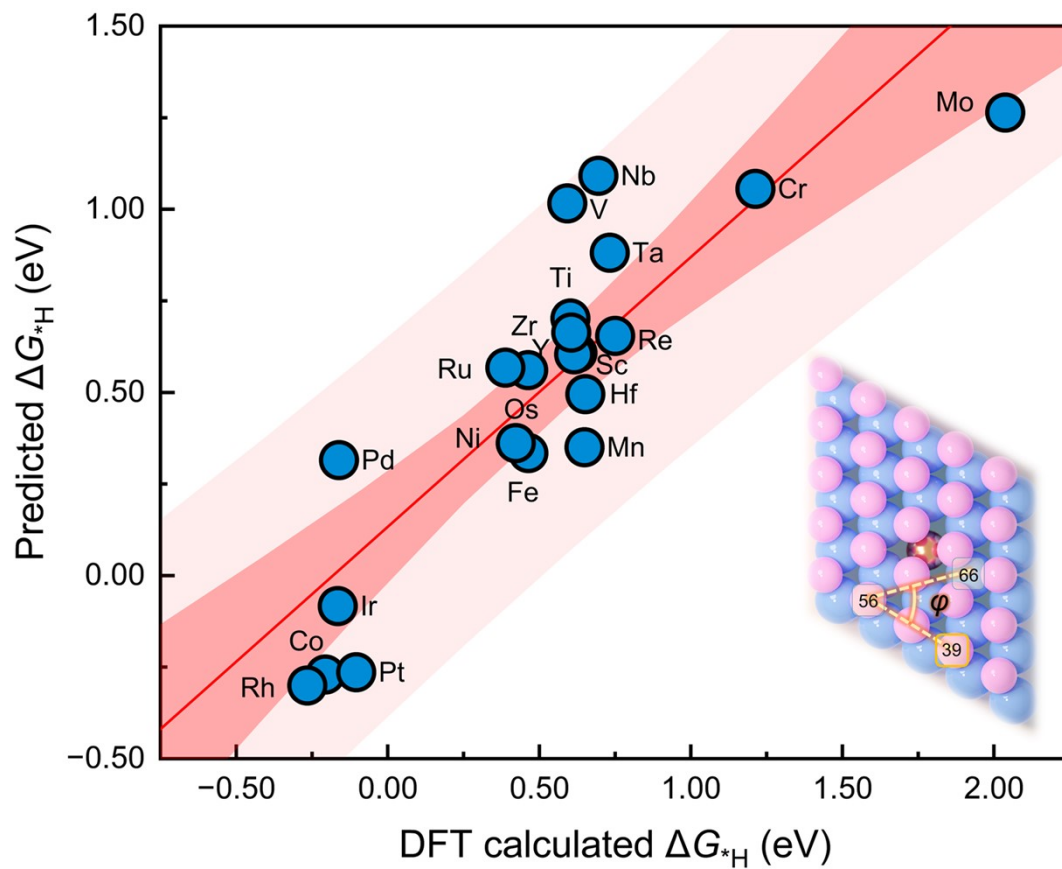

227

228 **Figure S26.** The relationship between predicted HER activities with DFT-computed  
 229 values in  $TM_1@WSe_2-W$  system.

230

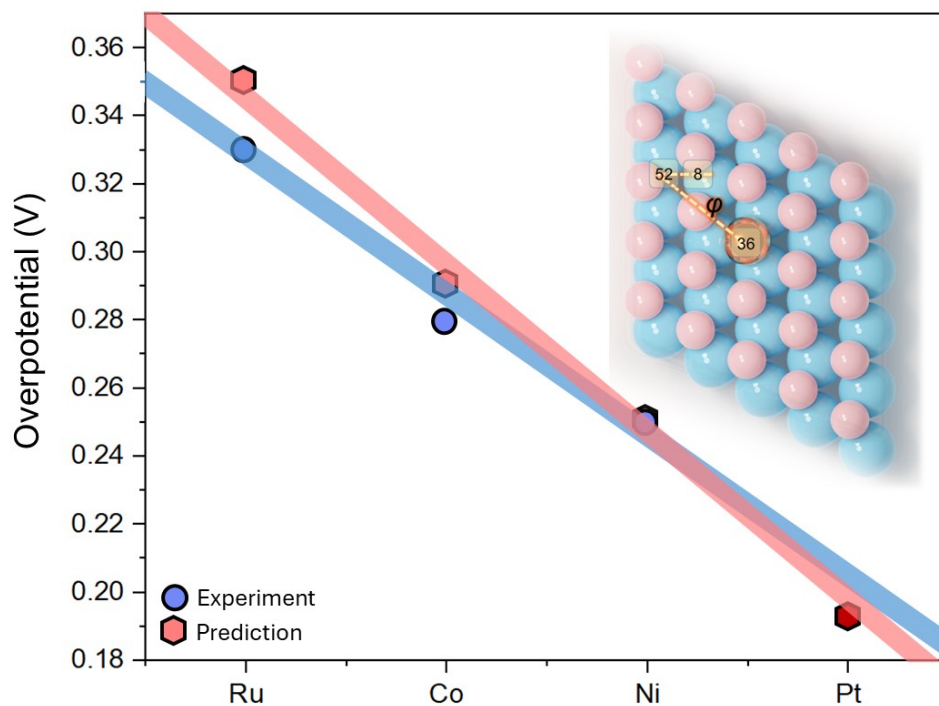

231

232 **Figure S27.** Comparison of experimental results and predicted OER overpotential  
 233 results. The blue line shows the fit to the mean experimental activity, while the red line  
 234 represents the fit to the predicted overpotentials.

235

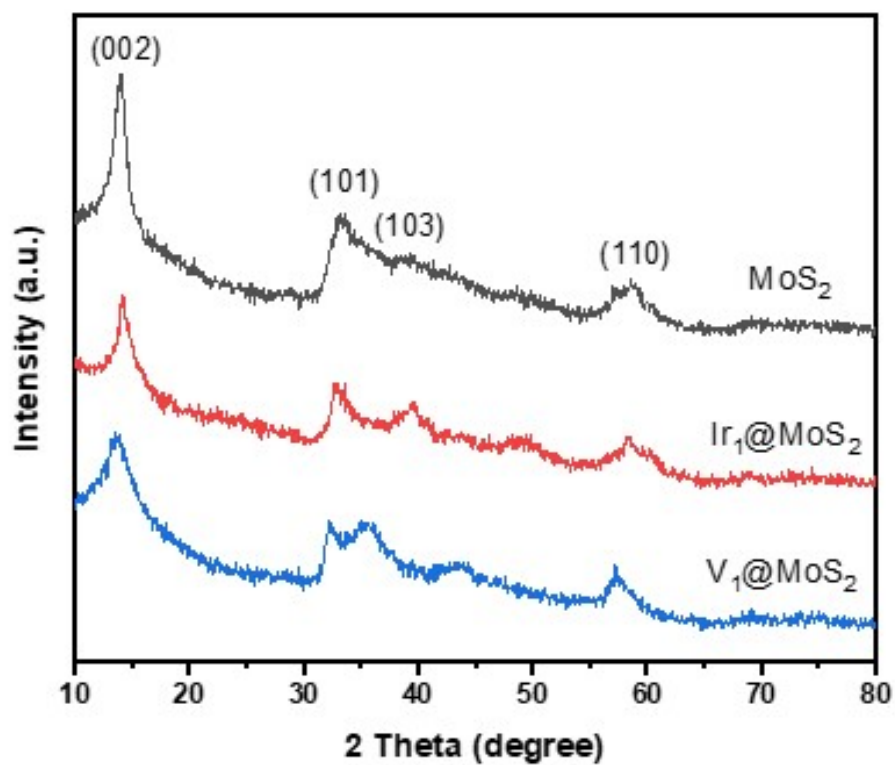

237

238

239

**Figure S28.** XRD patterns of the MoS<sub>2</sub>, Ir<sub>1</sub>@MoS<sub>2</sub> and V<sub>1</sub>@MoS<sub>2</sub> catalysts.

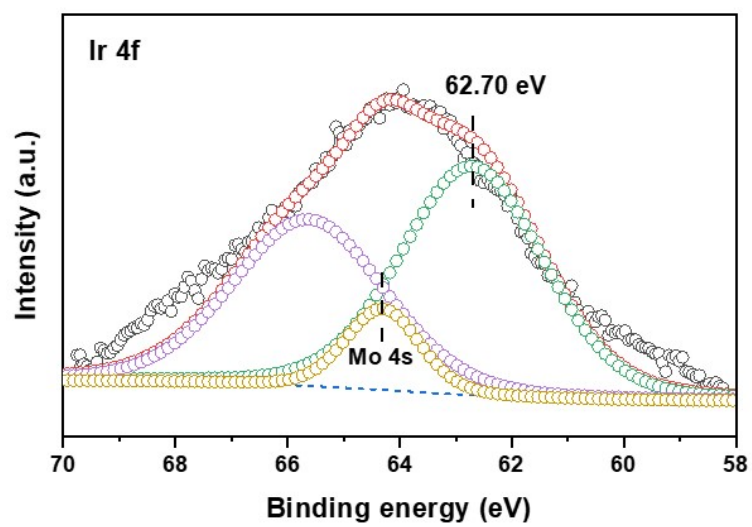

240

241

**Figure S29.** X-ray photoelectron spectra of Ir species.

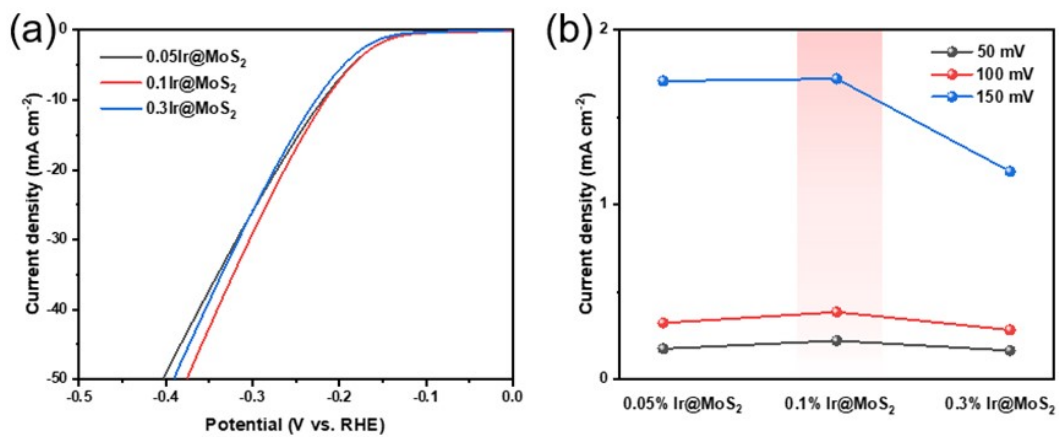

243

244 **Figure S30.** (a) HER polarization curves, and (b) Current densities at different  
 245 overpotentials over the Ir<sub>1</sub>@MoS<sub>2</sub> samples with different metal contents.

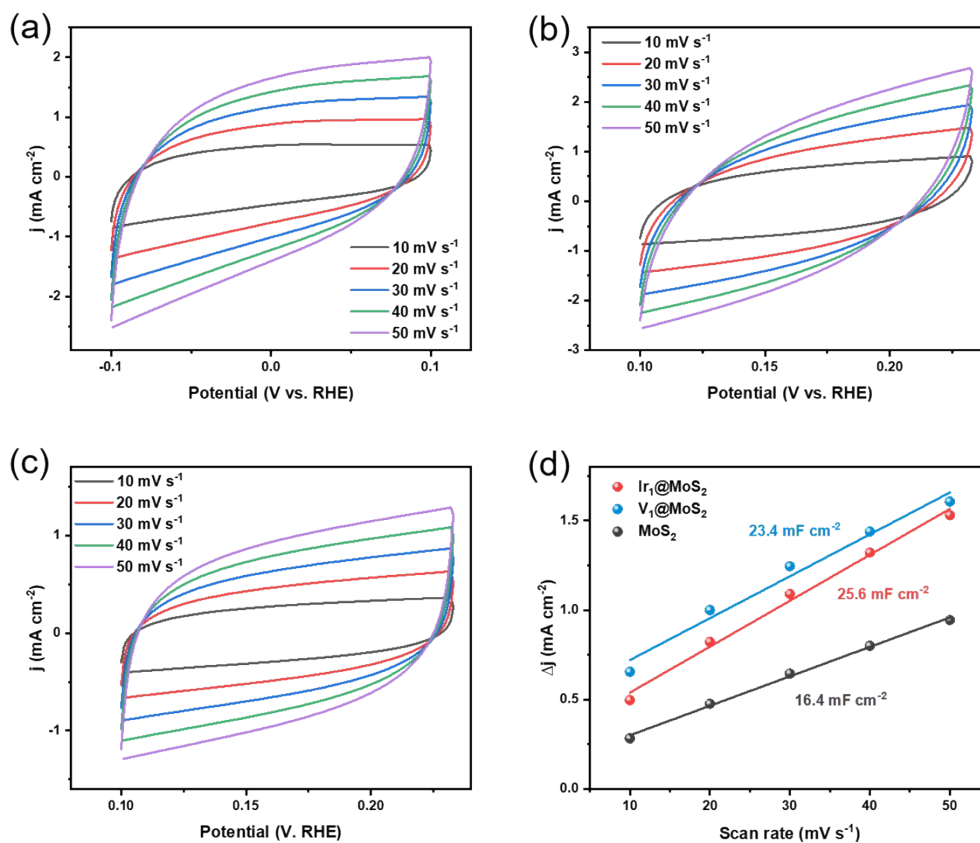

247

248 **Figure S31.** Current density plots against scan rates on (a) Ir<sub>1</sub>@MoS<sub>2</sub>, (b) V<sub>1</sub>@MoS<sub>2</sub>,

249 (c) MoS<sub>2</sub>, and (d) current density differences plotted against scan rates.

250

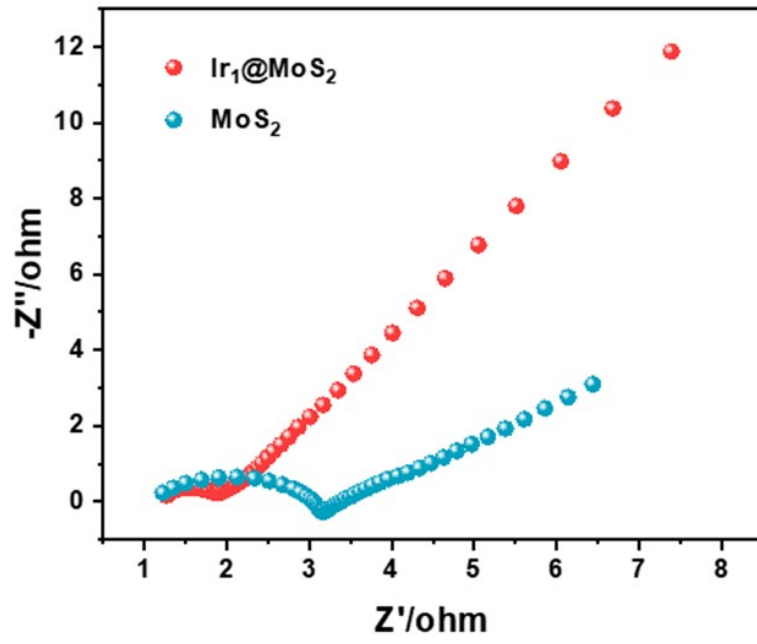

251

252 **Figure S32.** Electrochemical impedance spectroscopy evaluation for Ir<sub>1</sub>@MoS<sub>2</sub> and  
253 MoS<sub>2</sub> samples.

254

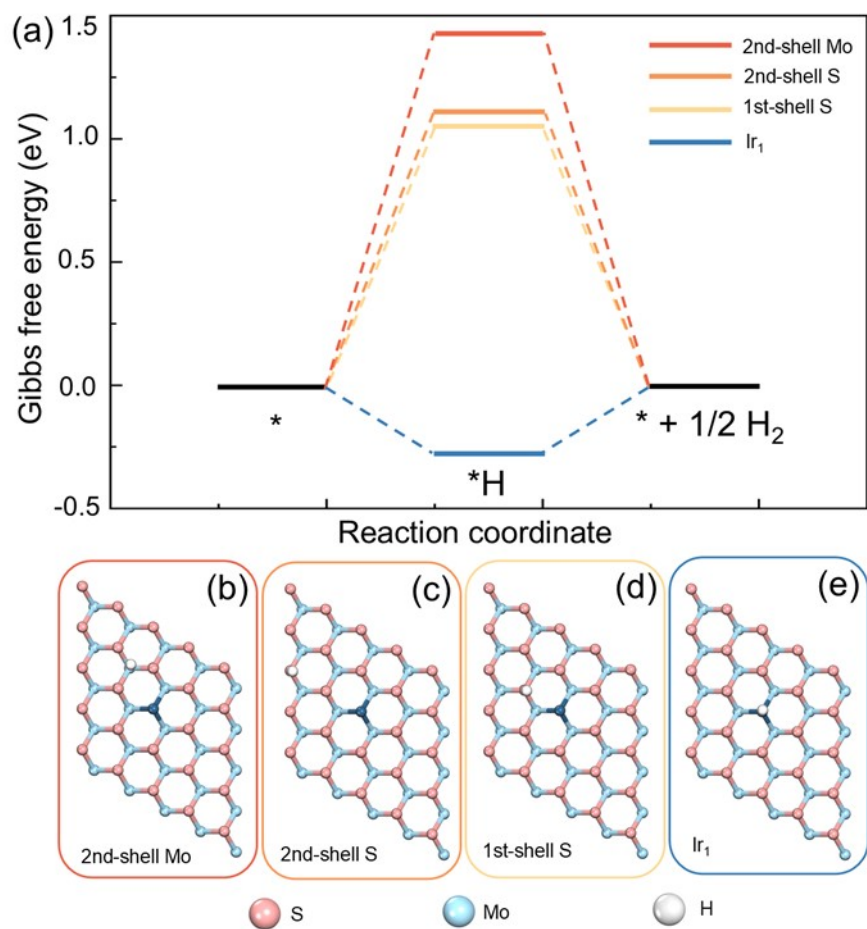

255

256 **Figure S33.** The reaction energy steps of the  $*H$  at different active sites in the  
257 Ir<sub>1</sub>@MoS<sub>2</sub> catalyst for HER.

258

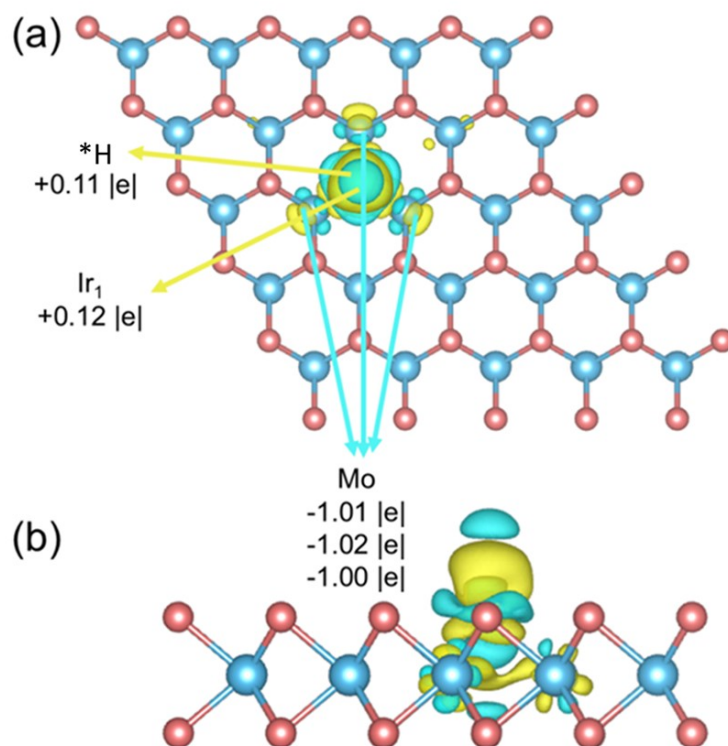

259

260 **Figure S34.** The differential charge density of Ir<sub>1</sub>@MoS<sub>2</sub>-S with H adsorbed. Yellow  
 261 represents electron accumulation, and blue represents electron loss.

262

263

264 **Table S1** Input features (band centers, eV) of SISSO of TM<sub>1</sub>@MoS<sub>2</sub>-S catalysts.

|    | M-s    | M-d    | S <sub>23</sub> -p | S <sub>1</sub> -s | S <sub>36</sub> -p | Mo <sub>52</sub> -s |
|----|--------|--------|--------------------|-------------------|--------------------|---------------------|
| Co | -1.272 | -0.910 | -2.531             | -12.006           | -2.513             | -6.400              |
| Cr | -0.464 | 0.781  | -2.496             | -11.998           | -2.457             | -6.394              |
| Fe | -1.765 | -1.805 | -3.013             | -12.516           | -2.957             | -6.903              |
| Hf | -1.536 | 0.953  | -2.224             | -11.664           | -2.100             | -6.030              |
| Ir | -1.654 | -1.190 | -2.337             | -11.837           | -2.281             | -6.238              |
| Mn | -0.475 | 0.157  | -1.991             | -11.519           | -1.934             | -5.902              |
| Mo | -1.221 | -0.102 | -2.555             | -12.035           | -2.455             | -6.395              |
| Nb | -1.767 | -0.062 | -3.104             | -12.630           | -3.044             | -6.899              |
| Ni | -0.634 | -0.513 | -2.026             | -11.489           | -1.943             | -5.838              |
| Os | -2.301 | -1.203 | -2.887             | -12.388           | -2.806             | -6.761              |
| Pd | 0.317  | -1.132 | -1.854             | -11.378           | -1.849             | -5.750              |
| Pt | -1.049 | -1.188 | -1.931             | -11.358           | -1.883             | -5.799              |
| Re | -1.443 | -0.206 | -2.305             | -11.768           | -2.285             | -6.161              |
| Rh | -0.343 | -0.951 | -2.233             | -11.719           | -2.184             | -6.075              |
| Ru | -1.083 | -1.070 | -2.701             | -12.250           | -2.637             | -6.619              |
| Sc | -0.701 | 0.966  | -2.609             | -12.041           | -2.498             | -6.455              |
| Ta | -2.692 | -0.598 | -3.246             | -12.806           | -3.066             | -7.132              |
| Tc | -0.607 | -0.251 | -2.113             | -11.624           | -2.024             | -5.965              |
| Ti | -1.117 | 1.108  | -2.101             | -11.615           | -1.988             | -5.929              |
| V  | -1.714 | 0.124  | -2.727             | -12.210           | -2.643             | -6.582              |
| W  | -2.188 | -0.379 | -2.765             | -12.365           | -2.708             | -6.637              |
| Y  | -0.949 | 1.260  | -2.651             | -12.215           | -2.606             | -6.516              |
| Zr | -1.419 | 0.963  | -2.192             | -11.710           | -2.071             | -5.947              |

265

266

267 **Table S2** Input features (band centers, eV) of SISO of TM<sub>1</sub>@WSe<sub>2</sub>-Se catalysts.

|    | M-s    | M-d    | Se <sub>23</sub> -p | Se <sub>1</sub> -s | Se <sub>36</sub> -p | W <sub>52</sub> -s |
|----|--------|--------|---------------------|--------------------|---------------------|--------------------|
| Co | -1.962 | -1.029 | -2.704              | -12.401            | -2.525              | -6.261             |
| Cr | -1.069 | 0.720  | -2.630              | -12.317            | -2.437              | -6.165             |
| Fe | -2.290 | -1.165 | -3.015              | -12.719            | -2.813              | -6.640             |
| Hf | -1.801 | 0.945  | -2.380              | -12.130            | -2.202              | -6.015             |
| Ir | -2.518 | -1.500 | -2.517              | -12.166            | -2.241              | -6.015             |
| Mn | -0.949 | -0.005 | -2.213              | -11.943            | -2.064              | -5.744             |
| Mo | -1.514 | -0.219 | -2.678              | -12.405            | -2.557              | -6.280             |
| Nb | -1.966 | -0.473 | -3.335              | -12.940            | -3.257              | -6.677             |
| Ni | -1.305 | -0.780 | -2.134              | -11.845            | -1.987              | -5.648             |
| Os | -2.742 | -1.317 | -2.656              | -12.402            | -2.288              | -6.304             |
| Pd | -0.417 | -1.552 | -2.030              | -11.742            | -1.932              | -5.554             |
| Pt | -1.861 | -1.735 | -2.098              | -11.793            | -1.908              | -5.655             |
| Re | -2.437 | -0.699 | -2.578              | -12.314            | -2.450              | -6.034             |
| Rh | -1.166 | -1.202 | -2.370              | -12.062            | -2.126              | -5.915             |
| Ru | -1.686 | -1.315 | -2.774              | -12.438            | -2.520              | -6.366             |
| Sc | -0.787 | 1.237  | -2.784              | -12.418            | -2.595              | -6.192             |
| Ta | -2.921 | -0.781 | -3.443              | -13.183            | -3.317              | -7.026             |
| Tc | -0.940 | -0.201 | -2.303              | -12.027            | -2.158              | -5.949             |
| Ti | -1.157 | 0.953  | -2.342              | -12.077            | -2.171              | -6.222             |
| V  | -2.033 | 0.078  | -2.946              | -12.706            | -2.807              | -6.497             |
| W  | -2.898 | -0.704 | -3.057              | -12.801            | -2.884              | -6.782             |
| Y  | -1.109 | 1.050  | -2.819              | -12.528            | -2.584              | -6.312             |
| Zr | -1.240 | 0.935  | -2.388              | -12.059            | -2.212              | -5.891             |

268

**Table S3** Input features (band centers, eV) of SISO of TM<sub>1</sub>@WS<sub>2</sub>-S catalysts.

|    | M-s    | M-d    | S <sub>23</sub> -p | S <sub>1</sub> -s | S <sub>36</sub> -p | W <sub>52</sub> -s |
|----|--------|--------|--------------------|-------------------|--------------------|--------------------|
| Co | -1.531 | -0.902 | -2.795             | -12.204           | -2.581             | -7.040             |
| Cr | -0.705 | 0.857  | -2.887             | -12.178           | -2.707             | -6.982             |
| Fe | -2.037 | -1.393 | -3.521             | -12.816           | -3.378             | -7.629             |
| Hf | -1.408 | 1.063  | -2.530             | -11.924           | -2.381             | -6.715             |
| Ir | -2.052 | -1.443 | -2.635             | -11.911           | -2.427             | -6.763             |
| Mn | -0.714 | -0.004 | -2.406             | -11.731           | -2.221             | -6.553             |
| Mo | -0.981 | -0.086 | -2.863             | -12.185           | -2.701             | -7.000             |
| Nb | -1.345 | -0.047 | -3.314             | -12.745           | -3.275             | -7.396             |
| Ni | -1.053 | -0.299 | -2.322             | -11.607           | -2.119             | -6.358             |
| Os | -2.650 | -1.492 | -3.186             | -12.526           | -3.004             | -7.290             |
| Pd | -0.027 | -1.319 | -2.136             | -11.638           | -2.016             | -6.335             |
| Pt | -1.536 | -1.426 | -2.292             | -11.472           | -2.118             | -6.349             |
| Re | -1.950 | -0.427 | -2.685             | -11.975           | -2.526             | -6.688             |
| Rh | -0.621 | -1.207 | -2.506             | -11.848           | -2.427             | -6.623             |
| Ru | -1.332 | -1.358 | -2.992             | -12.273           | -2.883             | -7.107             |
| Sc | -0.405 | 1.531  | -3.049             | -12.441           | -2.855             | -7.309             |
| Ta | -2.859 | -0.647 | -3.767             | -13.068           | -3.602             | -7.857             |
| Tc | -0.693 | -0.262 | -2.457             | -11.811           | -2.295             | -6.658             |
| Ti | -0.831 | 1.038  | -2.487             | -11.829           | -2.245             | -6.671             |
| V  | -1.518 | 0.069  | -3.117             | -12.450           | -2.946             | -7.229             |
| W  | -2.390 | -0.542 | -3.139             | -12.499           | -3.023             | -7.297             |
| Y  | -0.629 | 1.372  | -3.094             | -12.336           | -2.812             | -7.155             |
| Zr | -2.175 | 0.179  | -2.839             | -12.232           | -2.637             | -6.993             |

271 **Table S4** Input features (band centers, eV) of SISSO of TM<sub>1</sub>@MoSe<sub>2</sub>-Se catalysts.

|    | M-s    | M-d    | Se <sub>23</sub> -p | Se <sub>1</sub> -s | Se <sub>36</sub> -p | Mo <sub>52</sub> -s |
|----|--------|--------|---------------------|--------------------|---------------------|---------------------|
| Co | -1.789 | -1.015 | -2.442              | -12.314            | -2.215              | -6.264              |
| Cr | -1.092 | 0.367  | -2.444              | -12.338            | -2.231              | -6.227              |
| Fe | -2.118 | -1.671 | -2.867              | -12.885            | -2.689              | -6.790              |
| Hf | -2.169 | 0.590  | -2.190              | -12.126            | -1.967              | -5.946              |
| Ir | -1.896 | -1.379 | -2.176              | -12.123            | -2.005              | -6.118              |
| Mn | -1.171 | -0.137 | -2.028              | -11.903            | -1.800              | -5.812              |
| Mo | -1.953 | -0.282 | -2.546              | -12.465            | -2.353              | -6.325              |
| Nb | -2.650 | -0.389 | -3.110              | -12.925            | -2.924              | -6.834              |
| Ni | -1.075 | -0.496 | -1.893              | -11.827            | -1.770              | -5.813              |
| Os | -2.567 | -1.697 | -2.722              | -12.634            | -2.570              | -6.549              |
| Pd | -0.206 | -1.257 | -1.835              | -11.719            | -1.634              | -5.648              |
| Pt | -1.301 | -1.350 | -1.817              | -11.687            | -1.673              | -5.651              |
| Re | -2.072 | -0.420 | -2.280              | -12.212            | -2.182              | -6.094              |
| Rh | -1.091 | -1.081 | -2.107              | -12.069            | -1.920              | -5.950              |
| Ru | -1.939 | -1.356 | -2.590              | -12.530            | -2.402              | -6.494              |
| Sc | -1.524 | 1.448  | -2.559              | -12.315            | -2.338              | -6.105              |
| Ta | -3.387 | -0.863 | -3.112              | -13.043            | -3.007              | -6.893              |
| Tc | -1.440 | -0.264 | -2.051              | -11.994            | -1.862              | -5.930              |
| Ti | -1.857 | 0.900  | -2.076              | -12.036            | -1.946              | -5.889              |
| V  | -2.343 | 0.002  | -2.686              | -12.628            | -2.501              | -6.512              |
| W  | -2.846 | -0.675 | -2.823              | -12.757            | -2.647              | -6.616              |
| Y  | -1.619 | 1.016  | -2.532              | -12.466            | -2.330              | -6.341              |
| Zr | -2.069 | 0.692  | -2.155              | -12.097            | -1.944              | -5.935              |

272

273

274 **Table S5** Input features (band centers, eV) of SISSO of  $\text{TM}_1@MoS_2$ -Mo catalyst.

|    | M-s    | M-d    | S <sub>19</sub> -p | Mo <sub>69</sub> -s |
|----|--------|--------|--------------------|---------------------|
| Co | -7.088 | -2.092 | -2.446             | -6.51               |
| Cr | -7.088 | -2.092 | -2.446             | -6.51               |
| Fe | -7.032 | -1.604 | -2.598             | -6.587              |
| Hf | -5.563 | -0.788 | -1.902             | -6.065              |
| Ir | -7.604 | -3.428 | -2.905             | -6.924              |
| Mn | -7.092 | -1.579 | -2.805             | -6.846              |
| Nb | -4.808 | 0.679  | -1.864             | -5.811              |
| Ni | -5.441 | -1.997 | -2.364             | -6.402              |
| Os | -7.812 | -3.2   | -3.156             | -7.14               |
| Pd | -5.423 | -2.952 | -2.518             | -6.543              |
| Pt | -7.223 | -4.291 | -2.757             | -6.764              |
| Re | -8.195 | -2.638 | -3.402             | -7.382              |
| Rh | -6.634 | -3.044 | -2.791             | -6.821              |
| Ru | -7.195 | -2.666 | -3.063             | -7.09               |
| Sc | -4.311 | 1.829  | -1.966             | -6.058              |
| Ta | -5.554 | -0.135 | -1.881             | -5.833              |
| Ti | -5.57  | 1.019  | -1.979             | -6.007              |
| V  | -5.72  | 0.513  | -1.911             | -5.822              |
| W  | -6.197 | -0.642 | -1.86              | -5.804              |
| Y  | -3.112 | -0.271 | -1.867             | -6.095              |
| Zr | -5.405 | 0.661  | -1.846             | -5.814              |

275

276

**Table S6** Input features of SISSO of  $\text{TM}_1@W\text{Se}_2\text{-W}$  catalysts.

|    | M-s    | $W_{56\text{-p}}$ | $\Delta G_{*H}$ |
|----|--------|-------------------|-----------------|
| Co | -5.944 | -4.149            | -0.206          |
| Cr | -5.205 | -3.477            | 1.213           |
| Fe | -5.651 | -4.009            | 0.464           |
| Hf | -4.773 | -3.494            | 0.652           |
| Ir | -6.498 | -4.242            | -0.165          |
| Mn | -5.925 | -4.253            | 0.649           |
| Mo | -5.111 | -3.535            | 2.037           |
| Nb | -4.546 | -3.615            | 0.695           |
| Ni | -5.395 | -3.817            | 0.422           |
| Os | -6.686 | -4.469            | 0.463           |
| Pd | -4.799 | -3.833            | -0.161          |
| Pt | -5.629 | -3.877            | -0.104          |
| Re | -6.993 | -5.047            | 0.750           |
| Rh | -5.669 | -4.28             | -0.265          |
| Ru | -6.019 | -4.332            | 0.388           |
| Sc | -3.303 | -3.595            | 0.626           |
| Ta | -4.939 | -3.415            | 0.733           |
| Ti | -5.033 | -3.777            | 0.602           |
| V  | -4.993 | -3.483            | 0.592           |
| Y  | -3.132 | -3.221            | 0.615           |
| Zr | -4.518 | -3.497            | 0.606           |

280 **Table S7** Band centers (eV) of metal sites in  $\text{TM}_1@MoS_2\text{-S}$  and  $\text{TM}_1@WSe_2\text{-Se}$ .

|    | S-vac: M     |              |              | Se-vac: M    |              |              |                                   |       |
|----|--------------|--------------|--------------|--------------|--------------|--------------|-----------------------------------|-------|
|    | $\epsilon_s$ | $\epsilon_p$ | $\epsilon_d$ | $\epsilon_s$ | $\epsilon_p$ | $\epsilon_d$ | $\epsilon_{M-d} - \epsilon_{M-d}$ |       |
| Co | -1.27        | -0.03        | -0.91        | Co           | -1.96        | -0.14        | -1.03                             | 0.12  |
| Cr | -0.46        | -0.03        | 0.78         | Cr           | -1.07        | 0.03         | 0.72                              | 0.06  |
| Fe | -1.77        | -0.63        | -1.81        | Fe           | -2.29        | -0.46        | -1.17                             | -0.64 |
| Hf | -1.54        | -0.14        | 0.95         | Hf           | -1.80        | -0.01        | 0.95                              | 0.01  |
| Ir | -1.65        | 0.23         | -1.19        | Ir           | -2.52        | 0.18         | -1.50                             | 0.31  |
| Mn | -0.48        | 0.66         | 0.16         | Mn           | -0.95        | 0.56         | -0.01                             | 0.16  |
| Nb | -1.77        | -1.10        | -0.06        | Nb           | -1.97        | -0.98        | -0.47                             | 0.41  |
| Ni | -0.63        | 0.60         | -0.51        | Ni           | -1.31        | 0.55         | -0.78                             | 0.27  |
| Os | -2.30        | -0.38        | -1.20        | Os           | -2.74        | -0.02        | -1.32                             | 0.11  |
| Pd | 0.32         | 0.86         | -1.13        | Pd           | -0.42        | 0.82         | -1.55                             | 0.42  |
| Pt | -1.05        | 0.78         | -1.19        | Pt           | -1.86        | 0.67         | -1.74                             | 0.55  |
| Re | -1.44        | 0.16         | -0.21        | Re           | -2.44        | 0.07         | -0.70                             | 0.49  |
| Rh | -0.34        | 0.39         | -0.95        | Rh           | -1.17        | 0.44         | -1.20                             | 0.25  |
| Ru | -1.08        | -0.24        | -1.07        | Ru           | -1.69        | -0.04        | -1.32                             | 0.25  |
| Sc | -0.70        | -0.27        | 0.97         | Sc           | -0.79        | -0.05        | 1.24                              | -0.27 |
| Ta | -2.69        | -1.22        | -0.60        | Ta           | -2.92        | -1.03        | -0.78                             | 0.18  |
| Ti | -1.12        | 0.41         | 1.11         | Ti           | -1.16        | 0.56         | 0.95                              | 0.16  |
| V  | -1.71        | -0.62        | 0.12         | V            | -2.03        | -0.37        | 0.08                              | 0.05  |
| Y  | -0.95        | -0.35        | 1.26         | Y            | -1.11        | -0.20        | 1.05                              | 0.21  |
| Zr | -1.42        | 0.68         | 0.96         | Zr           | -1.24        | 0.76         | 0.94                              | 0.03  |

281

282

283 **Table S8** Band centers (eV) of S/Se sites in  $\text{TM}_1@MoS_2\text{-Mo}$  and  $\text{TM}_1@WSe_2\text{-W}$ .

|    | Mo-vac: S    |              |              | W-vac: Se    |              |              |                                    |       |
|----|--------------|--------------|--------------|--------------|--------------|--------------|------------------------------------|-------|
|    | $\epsilon_s$ | $\epsilon_p$ | $\epsilon_d$ | $\epsilon_s$ | $\epsilon_p$ | $\epsilon_d$ | $\epsilon_{S-p} - \epsilon_{Se-p}$ |       |
| Co | -12.06       | -2.44        | -            | Co           | -11.87       | -2.41        | -                                  | -0.03 |
| Cr | -12.06       | -2.44        | -            | Cr           | -11.16       | -1.57        | -                                  | -0.87 |
| Fe | -12.22       | -2.63        | -            | Fe           | -11.74       | -2.25        | -                                  | -0.38 |
| Hf | -11.54       | -1.91        | -            | Hf           | -10.94       | -1.68        | -                                  | -0.23 |
| Ir | -12.49       | -2.99        | -            | Ir           | -12.02       | -2.46        | -                                  | -0.53 |
| Mn | -12.45       | -2.88        | -            | Mn           | -11.96       | -2.43        | -                                  | -0.44 |
| Nb | -11.22       | -1.80        | -            | Nb           | -11.06       | -1.48        | -                                  | -0.32 |
| Ni | -11.44       | -2.05        | -            | Ni           | -10.99       | -1.73        | -                                  | -0.32 |
| Os | -12.89       | -3.38        | -            | Os           | -12.06       | -2.53        | -                                  | -0.84 |
| Pd | -11.96       | -2.19        | -            | Pd           | -8.32        | -1.58        | -                                  | -0.62 |
| Pt | -12.42       | -2.92        | -            | Pt           | -7.97        | -1.16        | -                                  | -1.76 |
| Re | -13.22       | -3.60        | -            | Re           | -12.69       | -3.11        | -                                  | -0.49 |
| Rh | -12.29       | -2.74        | -            | Rh           | -11.80       | -2.07        | -                                  | -0.67 |
| Ru | -12.60       | -3.00        | -            | Ru           | -11.82       | -2.25        | -                                  | -0.75 |
| Sc | -11.45       | -1.88        | -            | Sc           | -10.88       | -1.56        | -                                  | -0.33 |
| Ta | -11.29       | -1.86        | -            | Ta           | -11.07       | -1.62        | -                                  | -0.24 |
| Ti | -11.27       | -1.80        | -            | Ti           | -11.08       | -1.62        | -                                  | -0.18 |
| V  | -11.21       | -1.73        | -            | V            | -11.01       | -1.52        | -                                  | -0.22 |
| Y  | -10.58       | -1.51        | -            | Y            | -11.14       | -1.50        | -                                  | -0.01 |
| Zr | -11.19       | -1.76        | -            | Zr           | -10.92       | -1.64        | -                                  | -0.12 |

284

285

286

288 **References**

- 289 1 G. Kresse and J. Hafner, *Phys. Rev. B*, 1993, **47**, 558–561.
- 290 2 V. Wang, N. Xu, J. C. Liu, G. Tang and W.-T. Geng, *Comput. Phys. Commun.*, 2021, **267**,  
291 108033.
- 292 3 G. Kresse and D. Joubert, *Phys. Rev. B*, 1999, **59**, 1758–1775.
- 293 4 J. P. Perdew, K. Burke and M. Ernzerhof, *Phys. Rev. Lett.*, 1996, **77**, 3865–3868.
- 294 5 J. P. Perdew, J. A. Chevary, S. H. Vosko, K. A. Jackson, M. R. Pederson, D. J. Singh and C.  
295 Fiolhais, *Phys. Rev. B*, 1992, **46**, 6671–6687.
- 296 6 S. Grimme, S. Ehrlich and L. Goerigk, *J. Comput. Chem.*, 2011, **32**, 1456–1465.
- 297 7 D. J. Chadi, *Phys. Rev. B*, 1977, **16**, 1746–1747.
- 298 8 J. K. Nørskov, J. Rossmeisl, A. Logadottir, L. Lindqvist, J. R. Kitchin, T. Bligaard and H.  
299 Jónsson, *J. Phys. Chem. B*, 2004, **108**, 17886–17892.
- 300 9 Y. Wang, A. J. Page, Y. Nishimoto, H.-J. Qian, K. Morokuma and S. Irle, *J. Am. Chem. Soc.*,  
301 2011, **133**, 18837–18842.
- 302 10 G. Di Liberto, L. A. Cipriano and G. Pacchioni, *J. Am. Chem. Soc.*, 2021, **143**, 20431–20441.
- 303 11 J. Rossmeisl, A. Logadottir and J. K. Nørskov, *Chem. Phys.*, 2005, **319**, 178–184.
- 304 12 J. Greeley, T. F. Jaramillo, J. Bonde, I. Chorkendorff and J. K. Nørskov, *Nat. Mater.*, 2006, **5**,  
305 909–913.
- 306 13 R. Parsons, *Trans. Faraday Soc.*, 1958, **54**, 1053.
- 307 14 J. K. Nørskov, T. Bligaard, A. Logadottir, J. R. Kitchin, J. G. Chen, S. Pandalov and U.  
308 Stimming, *J. Electrochem. Soc.*, 2005, **152**, J23.
- 309 15 R. Huang, M. F. Hanif, M. K. Siddiqui, M. F. Hanif and F. B. Petros, *Sci. Rep.*, 2024, **14**, 26552.  
310
